# Supplementary material
Source: PubMed Central journal article supplement (PMC8811051)
Supplement: 11606_2021_7098_MOESM1_ESM.pdf [file 11606_2021_7098_MOESM1_ESM.pdf]

# Supplemental File for “Empirical comparisons of 12 meta-analysis methods for synthesizing proportions of binary outcomes”

## Abbreviations/acronyms

Two-step (log): two-step method with the log transformation

Two-step (logit): two-step method with the logit transformation

Two-step (arcsine): two-step method with the arcsine-square-root transformation

Two-step (DAS-H): two-step method with the Freeman–Tukey double-arcsine transformation, using the harmonic mean of study-specific sample sizes as the overall sample size

Two-step (DAS-G): two-step method with the Freeman–Tukey double-arcsine transformation, using the geometric mean of study-specific sample sizes as the overall sample size

Two-step (DAS-A): two-step method with the Freeman–Tukey double-arcsine transformation, using the arithmetic mean of study-specific sample sizes as the overall sample size

Two-step (DAS-IV): two-step method with the Freeman–Tukey double-arcsine transformation, using the inverse of the variance of the synthesized result as the overall sample size

GLMM (log): generalized linear mixed model with the log link

GLMM (logit): generalized linear mixed model with the logit link

GLMM (probit): generalized linear mixed model with the probit link

GLMM (cauchit): generalized linear mixed model with the cauchit link

GLMM (cloglog): generalized linear mixed model with the complementary log-log link

AIC: Akaike information criterion

## A. Statistical methods for meta-analysis of proportions

Suppose a meta-analysis of proportions contains  $N$  studies, and study  $i$  reports  $e_i$  events from  $n_i$  samples ( $i = 1, \dots, N$ ). The estimated event proportion in study  $i$  is  $\hat{p}_i = e_i/n_i$ . The two-step methods first apply a transformation to the estimated proportion with each study. The log transformation yields  $g(\hat{p}_i) = \log \hat{p}_i$  with variance estimate  $v_i = 1/e_i - 1/n_i$ . The logit transformation yields  $g(\hat{p}_i) = \log[\hat{p}_i/(1 - \hat{p}_i)]$  with variance estimate  $v_i = 1/e_i + 1/(n_i - e_i)$ . The arcsine transformation yields  $g(\hat{p}_i) = \arcsin \sqrt{\hat{p}_i}$  with variance estimate  $v_i = 1/(4n_i)$ . The Freeman–Tukey double-arcsine transformation yields  $g(\hat{p}_i) = \arcsin \sqrt{e_i/(n_i + 1)} + \arcsin \sqrt{(e_i + 1)/(n_i + 1)}$  with variance estimate  $v_i = 1/(n_i + 0.5)$  (Freeman and Tukey, 1950). The log and logit transformations cannot directly handle zero event counts, and a continuity correction (e.g., 0.5) is needed for studies with zero event counts. The arcsine and Freeman–Tukey double-arcsine transformations do not need the continuity correction for zero event counts.

Consequently, conventional meta-analysis methods are applied to the study-specific transformed proportions  $y_i = g(\hat{p}_i)$  and their variance  $v_i$ . Under the random-effects setting, the synthesized estimate is  $\hat{\mu} = \sum_{i=1}^N w_i y_i / \sum_{i=1}^N w_i$  with variance  $(\sum_{i=1}^N w_i)^{-1}$ , where  $w_i = 1/(v_i + \hat{\tau}^2)$  and  $\hat{\tau}^2$  is an estimate of the between-study variance  $\tau^2$ . Finally,  $\hat{\mu}$  and its confidence interval are back-transformed to the original proportion scale (ranging from 0% to 100%).

The back-transformations of the log, logit, and arcsine transformations are straightforward; they are  $g^{-1}(\hat{\mu}) = \exp(\hat{\mu})$ ,  $g^{-1}(\hat{\mu}) = \exp(\hat{\mu})/[1 + \exp(\hat{\mu})]$ , and  $g^{-1}(\hat{\mu}) = \sin^2 \hat{\mu}$ , accordingly. The back-transformation of the Freeman–Tukey double-arcsine transformation is complicated (Miller, 1978):

$$g^{-1}(\hat{\mu}; n) = 0.5 \left\{ 1 - \operatorname{sgn}(\cos \hat{\mu}) \sqrt{1 - \left( \sin \hat{\mu} + \frac{\sin \hat{\mu} - \sin^{-1} \hat{\mu}}{n} \right)^2} \right\},$$

where  $\operatorname{sgn}(\cdot)$  denotes the sign function. This back-transformation depends on a specific sample size  $n$ . The sample size is explicitly defined in each individual study, but its definition is not clear for the synthesized result from the meta-analysis. Arguably, to represent a summary of the sample sizes of all studies in the meta-analysis,  $n$  may be the harmonic, geometric, or arithmetic mean of the study-specific sample sizes  $n_i$ . Of note, the harmonic mean  $\leq$  the geometric mean  $\leq$  the arithmetic mean.

Alternatively, the generalized linear mixed model (GLMM) is a one-step method for meta-analysis of proportions. It does not need data transformations at the individual study level. Instead, the GLMM directly models event counts with binomial likelihoods and uses a specific link function to transform latent true proportions to a linear scale. The GLMM can be specified as follows:

$$\begin{aligned} e_i &\sim \operatorname{bin}(n_i, p_i); \\ g(p_i) &= \mu + \theta_i; \\ \theta_i &\sim N(0, \tau^2), \end{aligned}$$

where  $p_i$  is the true proportion of study  $i$ ,  $\mu$  is the overall proportion on the transformed scale via the link function  $g(\cdot)$ .

The various methods can be implemented with several R packages, including the functions `rma.uni()` and `rma.glmm()` in the R package “metafor,” the function `metaprop()` in the R package “meta,” and the functions `maprop.twostep()` and `maprop.glmm()` in the R package “altmeta.” Users may refer to the manuals of these packages for instructions and examples.

## References

- Freeman, M. F. and Tukey, J. W. Transformations related to the angular and the square root. *The Annals of Mathematical Statistics*, 21(4):607–611, 1950.
- Miller, J. J. The inverse of the freeman–tukey double arcsine transformation. *The American Statistician*, 32(4):138, 1978.

**B. Additional results**

Table S1: Basic characteristics of datasets of proportions from Cochrane reviews.

| Characteristic    | Median | Interquartile range (IQR) | Minimum | Maximum   |
|-------------------|--------|---------------------------|---------|-----------|
| Number of studies | 5      | 3 to 7                    | 3       | 167       |
| Total event count | 56     | 18 to 163                 | 0       | 278,007   |
| Total sample size | 438    | 200 to 1,049              | 3       | 5,122,913 |
| Crude event rate  | 12.6%  | 4.4% to 29.8%             | 0%      | 100%      |

Table S2: Number of datasets in categories based on the number of studies within a meta-analysis.

| No. of studies | No. of datasets |
|----------------|-----------------|
| 3              | 13,059          |
| 4              | 8,173           |
| 5              | 5,428           |
| 6              | 3,671           |
| 7              | 2,616           |
| 8              | 2,018           |
| 9              | 1,553           |
| 10             | 1,208           |
| 11             | 922             |
| 12             | 719             |
| 13             | 583             |
| 14             | 502             |
| 15             | 413             |
| 16             | 329             |
| 17             | 255             |
| 18             | 251             |
| 19             | 195             |
| 20             | 149             |
| >20            | 1,600           |

Table S3: Number of datasets in categories based on the total event count within a meta-analysis.

| Total event count | No. of datasets |
|-------------------|-----------------|
| 0                 | 1,063           |
| 1                 | 779             |
| 2                 | 771             |
| 3                 | 715             |
| 4                 | 694             |
| 5                 | 594             |
| 6                 | 621             |
| 7                 | 604             |
| 8                 | 540             |
| 9                 | 541             |
| 10                | 522             |
| 11                | 542             |
| 12                | 495             |
| 13                | 547             |
| 14                | 523             |
| 15                | 411             |
| 16                | 488             |
| 17                | 416             |
| 18                | 459             |
| 19                | 430             |
| 20                | 403             |
| >20               | 31,486          |

Table S4: Number of datasets in categories based on the total sample size within a meta-analysis.

| Total sample size | No. of datasets |
|-------------------|-----------------|
| 1–10              | 33              |
| 11–20             | 45              |
| 21–30             | 82              |
| 31–40             | 226             |
| 41–50             | 356             |
| 51–60             | 484             |
| 61–70             | 586             |
| 71–80             | 586             |
| 81–90             | 685             |
| 91–100            | 698             |
| 101–110           | 742             |
| 111–120           | 644             |
| 121–130           | 789             |
| 131–140           | 811             |
| 141–150           | 747             |
| 151–160           | 669             |
| 161–170           | 706             |
| 171–180           | 629             |
| 181–190           | 740             |
| 191–200           | 706             |
| >200              | 32,680          |

Table S5: Number of datasets in categories based on the crude event rate of a meta-analysis.

| Crude event rate (%) | No. of datasets |
|----------------------|-----------------|
| 0–0.1                | 1,211           |
| 0.1–0.5              | 1,040           |
| 0.5–1                | 1,272           |
| 1–5                  | 8,379           |
| 5–10                 | 7,110           |
| 10–20                | 8,719           |
| 20–30                | 5,084           |
| 30–40                | 3,276           |
| 40–50                | 2,515           |
| 50–60                | 1,752           |
| 60–70                | 1,361           |
| 70–80                | 963             |
| 80–90                | 610             |
| 90–95                | 178             |
| 95–99                | 144             |
| 99–99.5              | 13              |
| 99.5–99.9            | 3               |
| 99.9–100             | 14              |



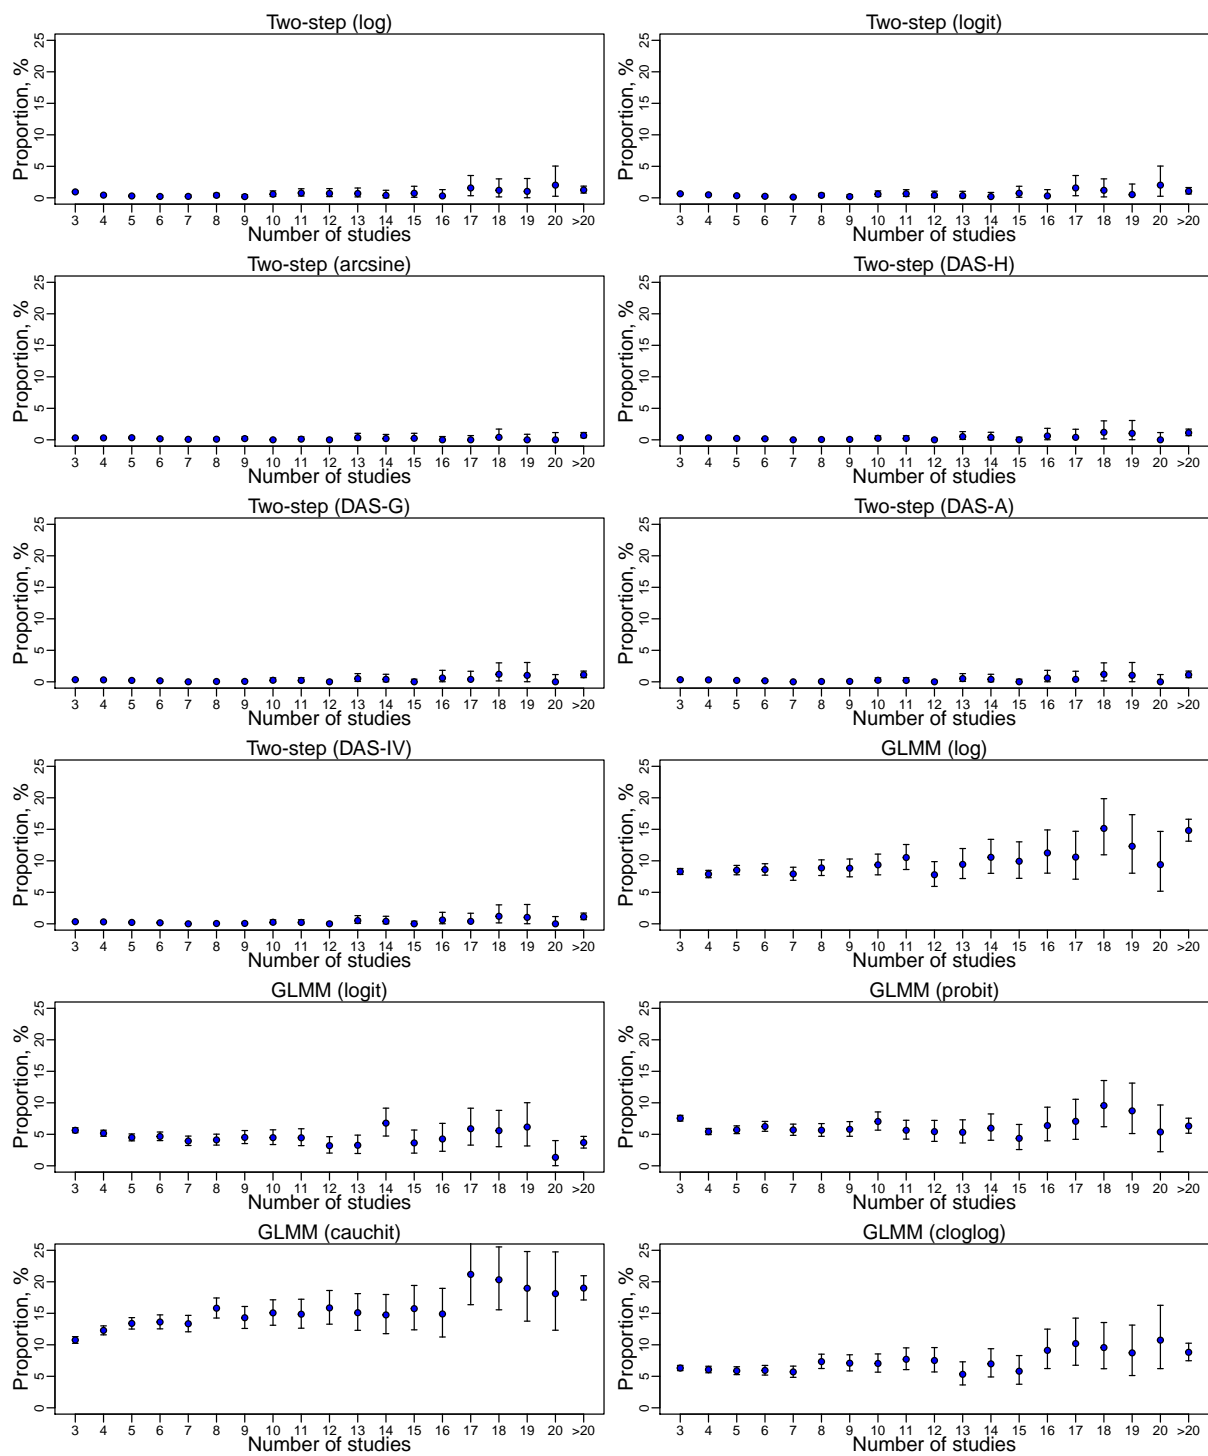

Figure S1: Proportions (with 95% confidence intervals) of Cochrane datasets that led to computational issues when using various meta-analysis methods, categorized by the number of studies within a meta-analysis.

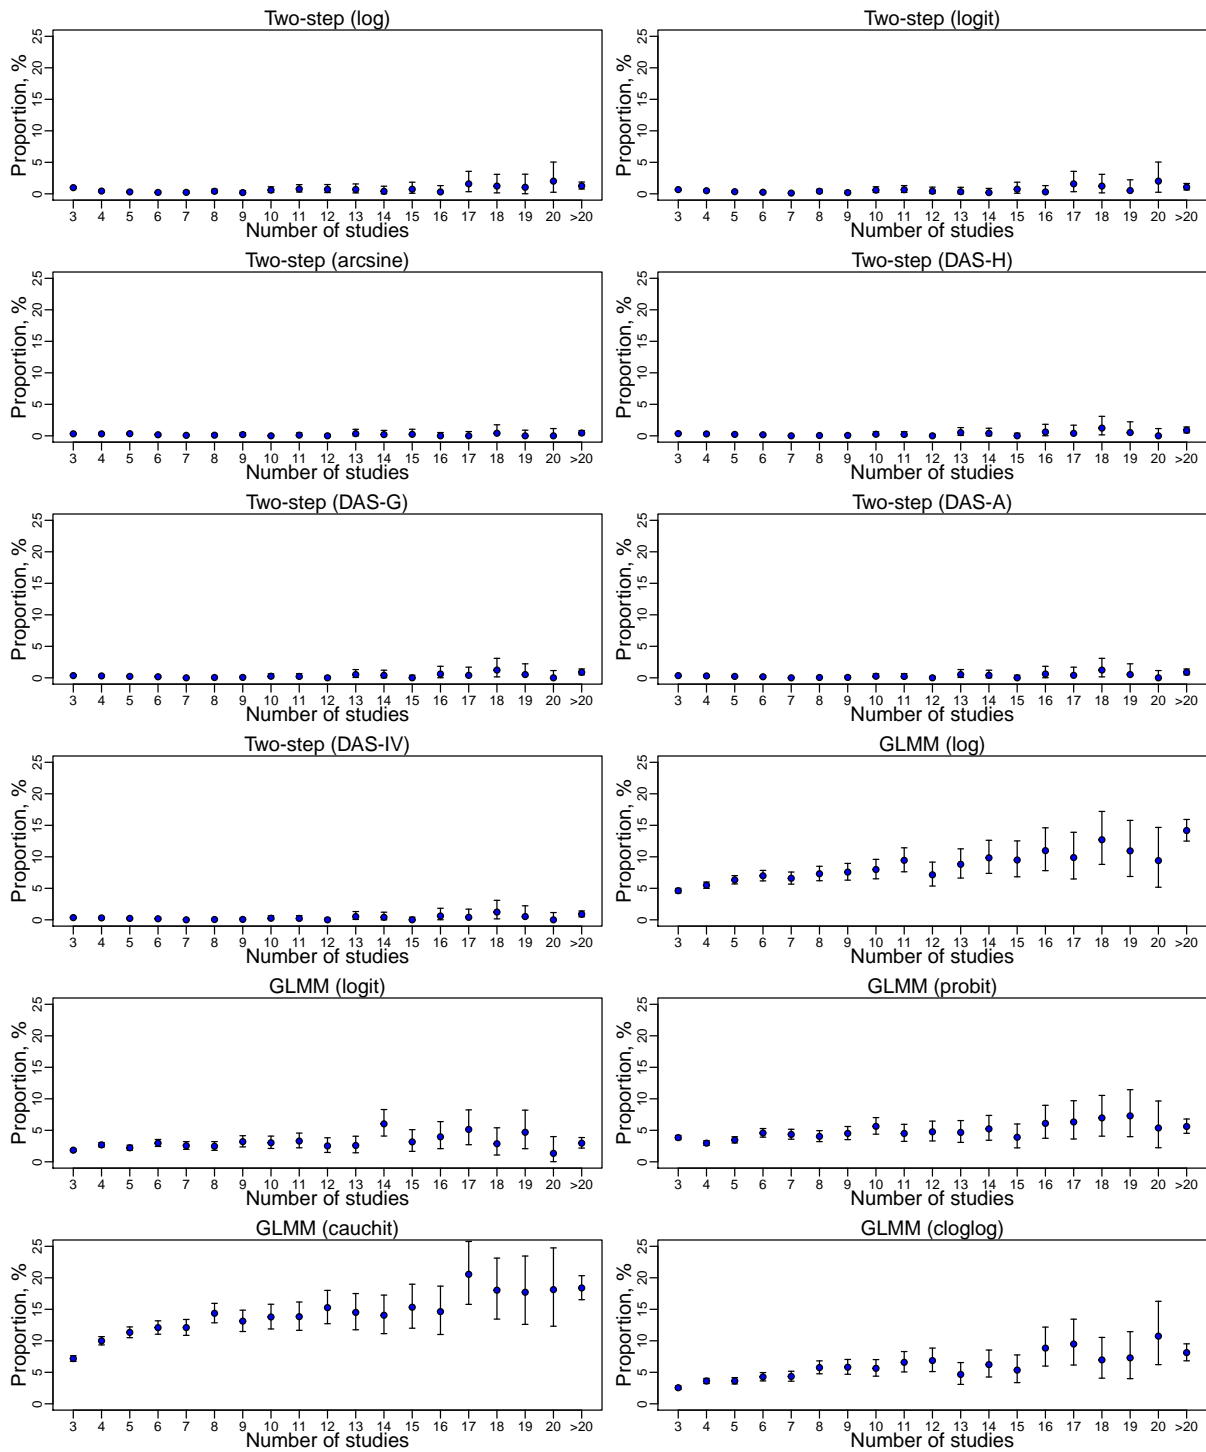

Figure S2: Proportions (with 95% confidence intervals) of Cochrane datasets that led to computational issues when using various meta-analysis methods, categorized by the number of studies within a meta-analysis, among the datasets with at least 1 total event count.

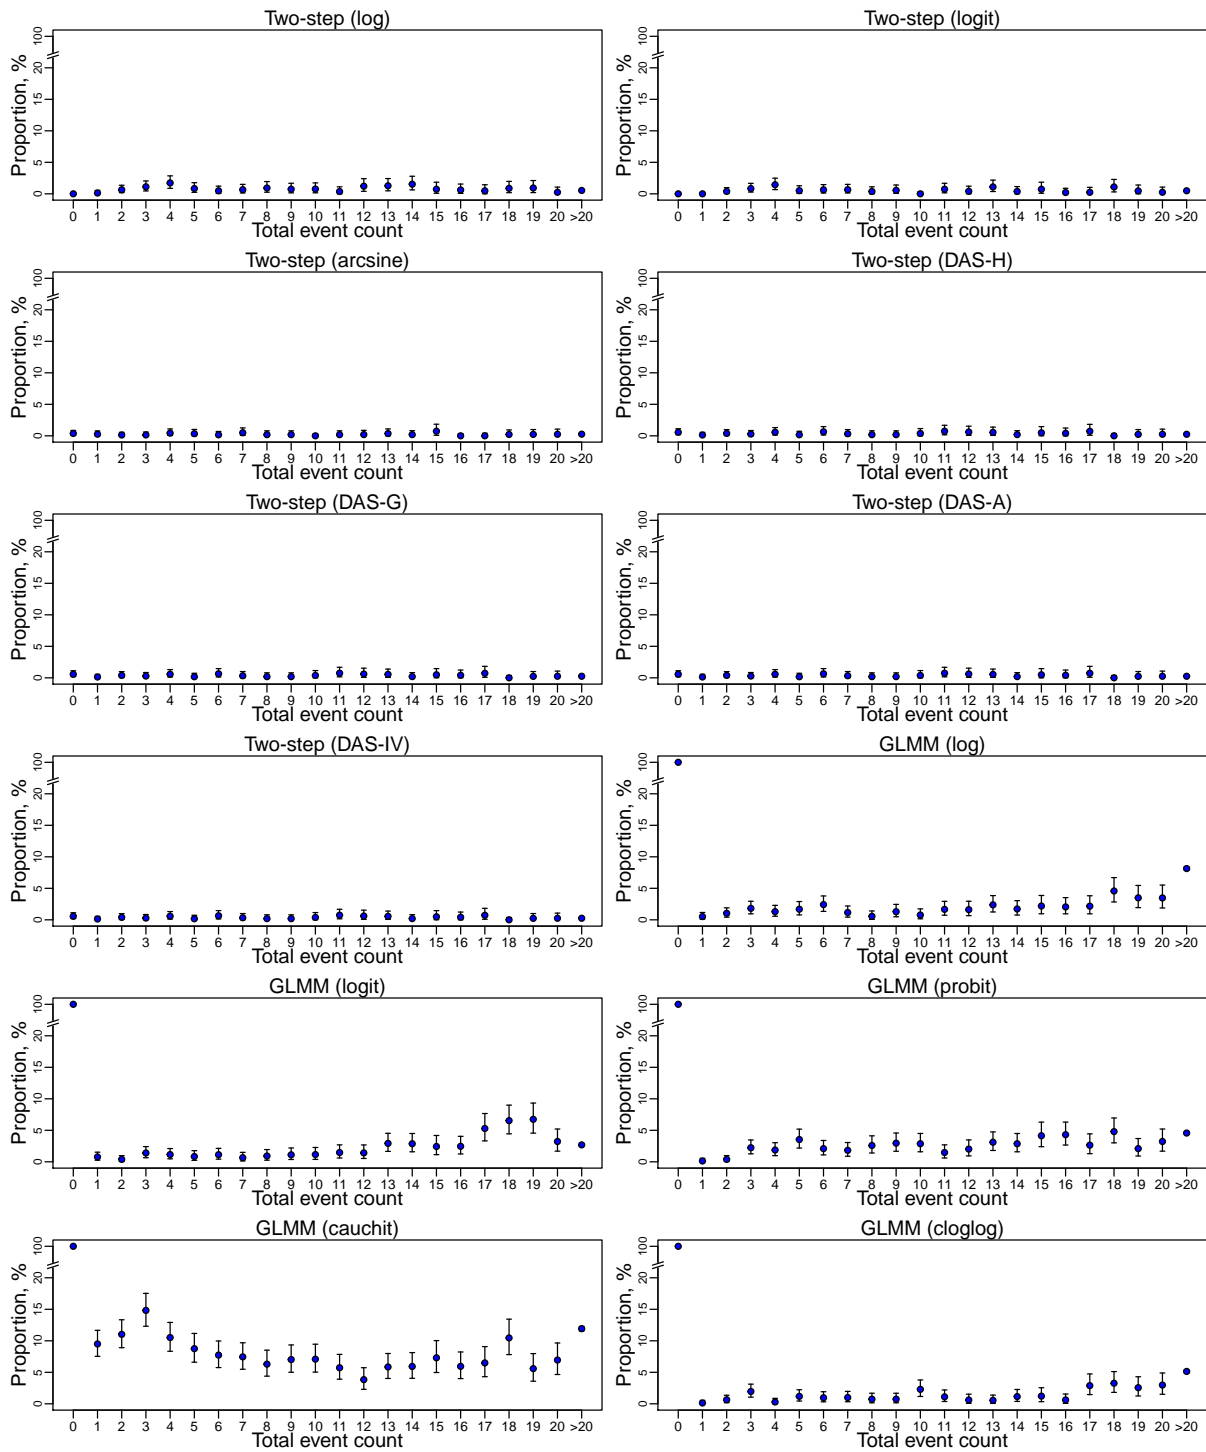

Figure S3: Proportions (with 95% confidence intervals) of Cochrane datasets that led to computational issues when using various meta-analysis methods, categorized by the total event count within a meta-analysis.

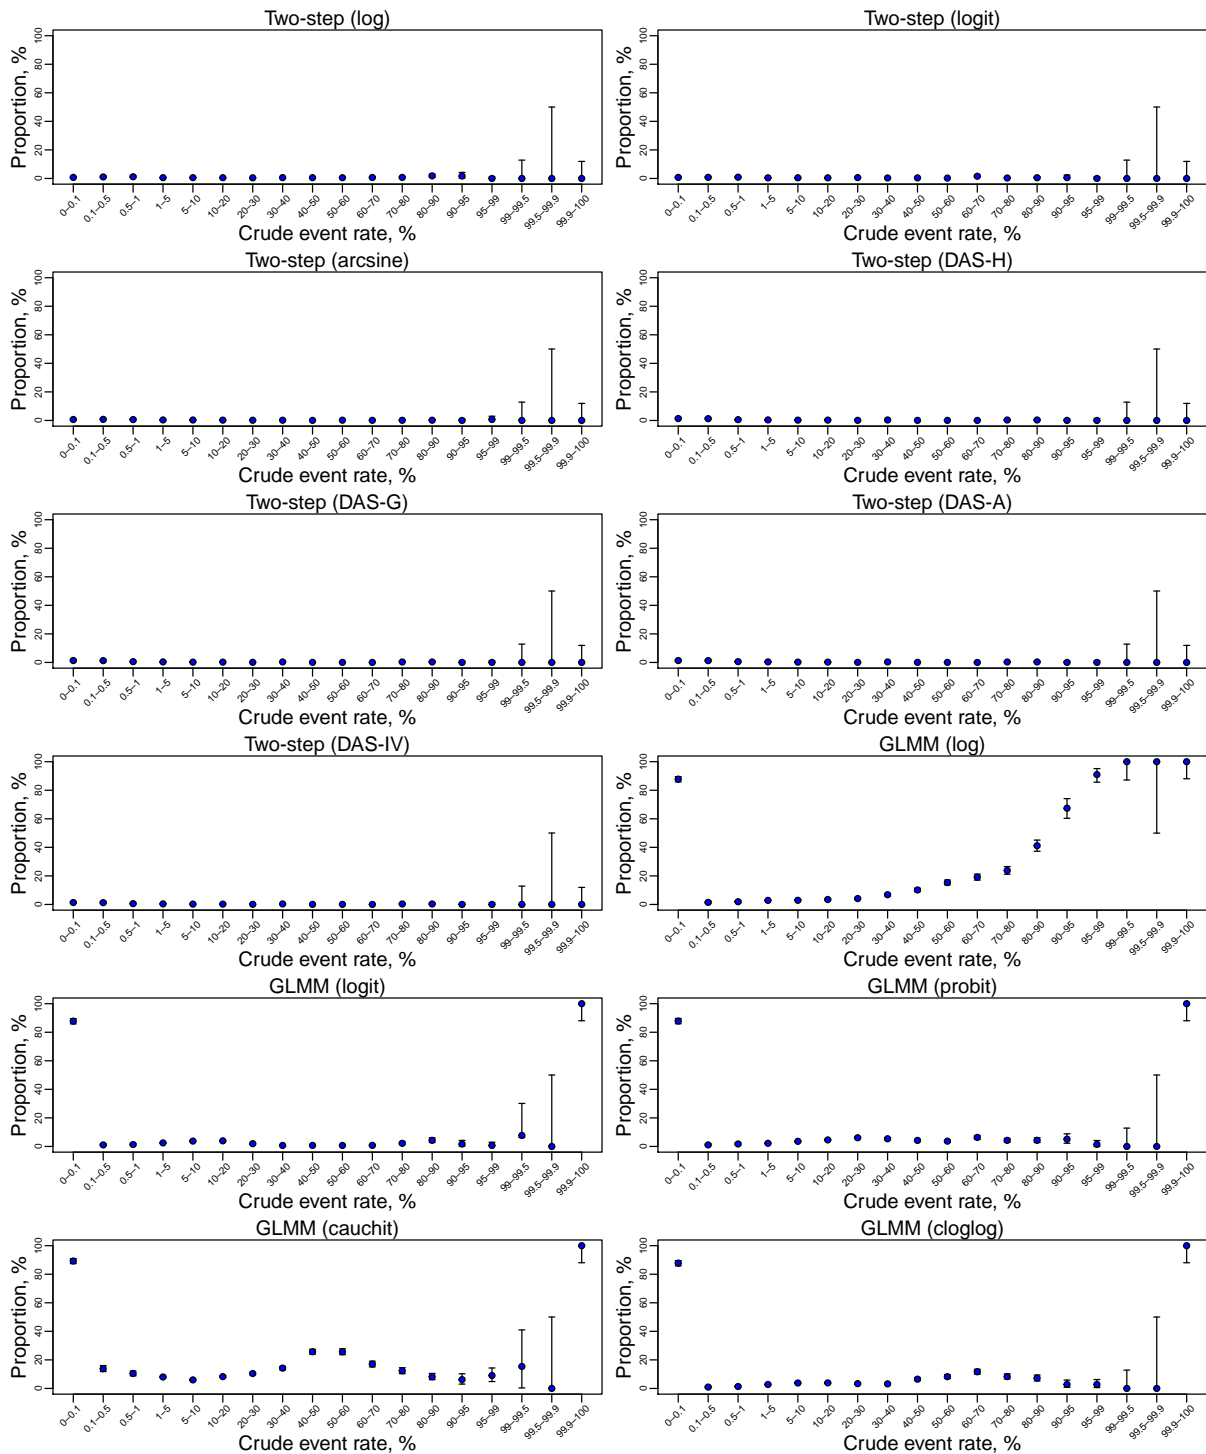

Figure S4: Proportions (with 95% confidence intervals) of Cochrane datasets that led to computational issues when using various meta-analysis methods, categorized by the crude event rate of a meta-analysis.

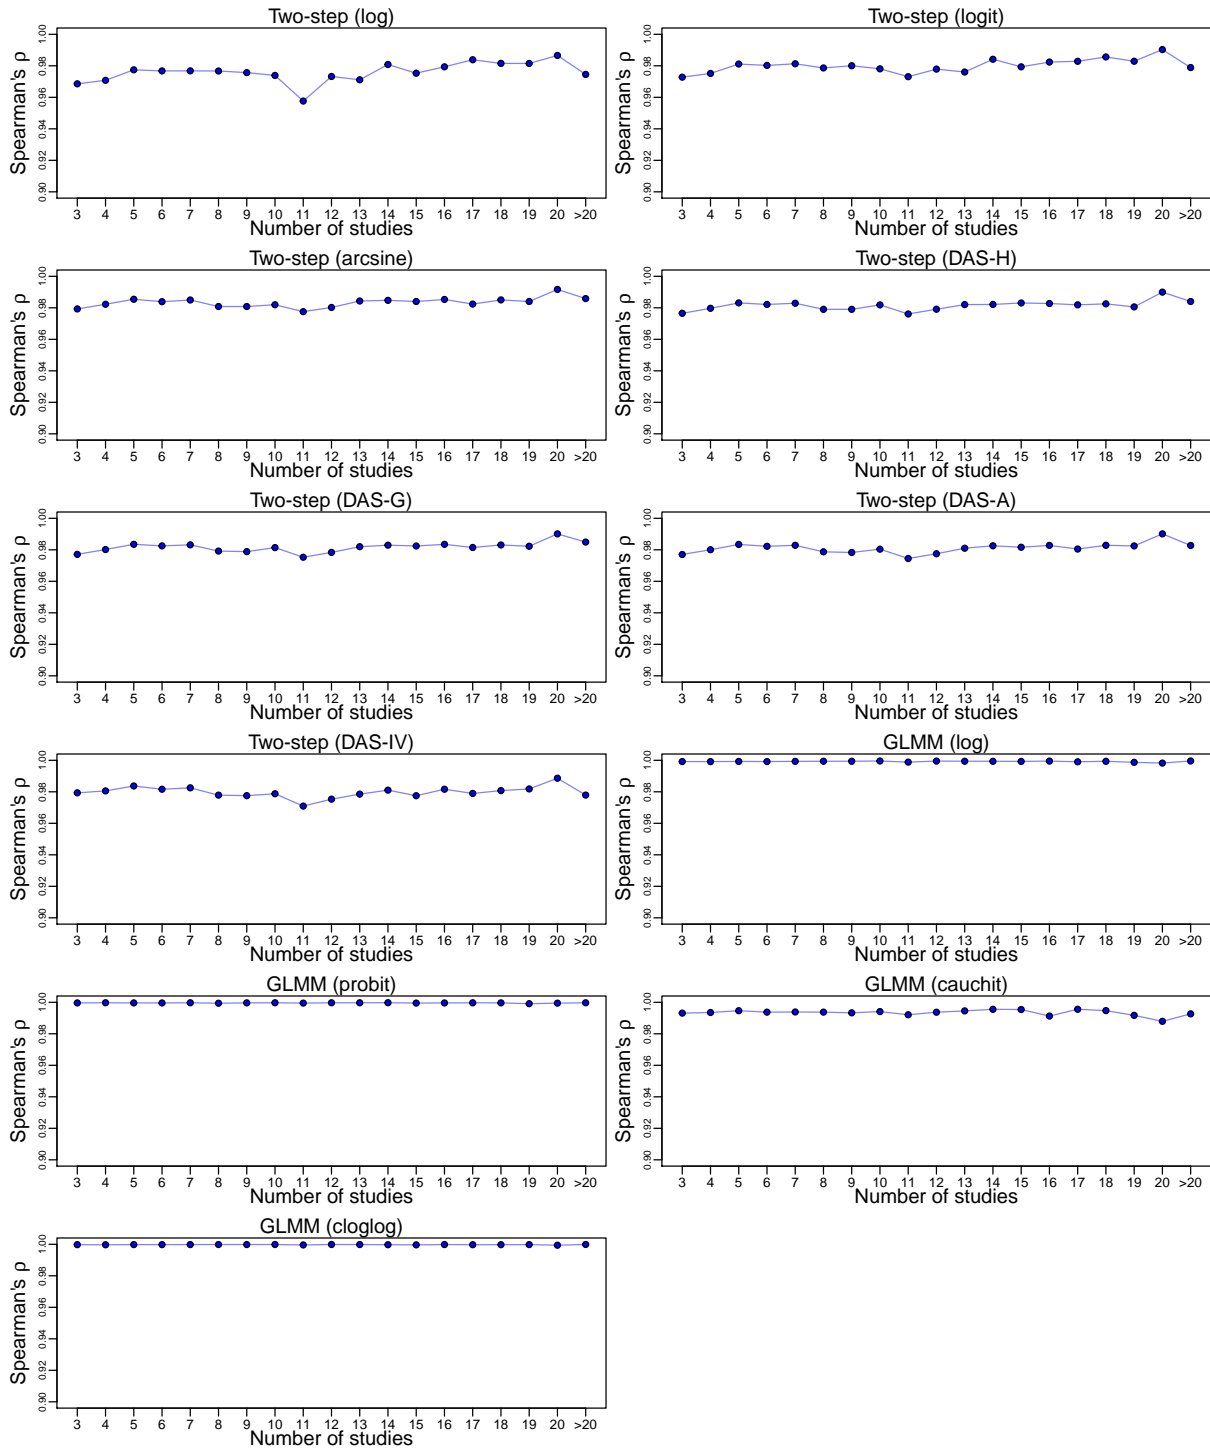

Figure S5: Spearman's rank correlation coefficients  $\rho$  between overall proportion estimates produced by various meta-analysis methods and those by the generalized linear mixed model with the logit link among Cochrane datasets, categorized by the number of studies within a meta-analysis.

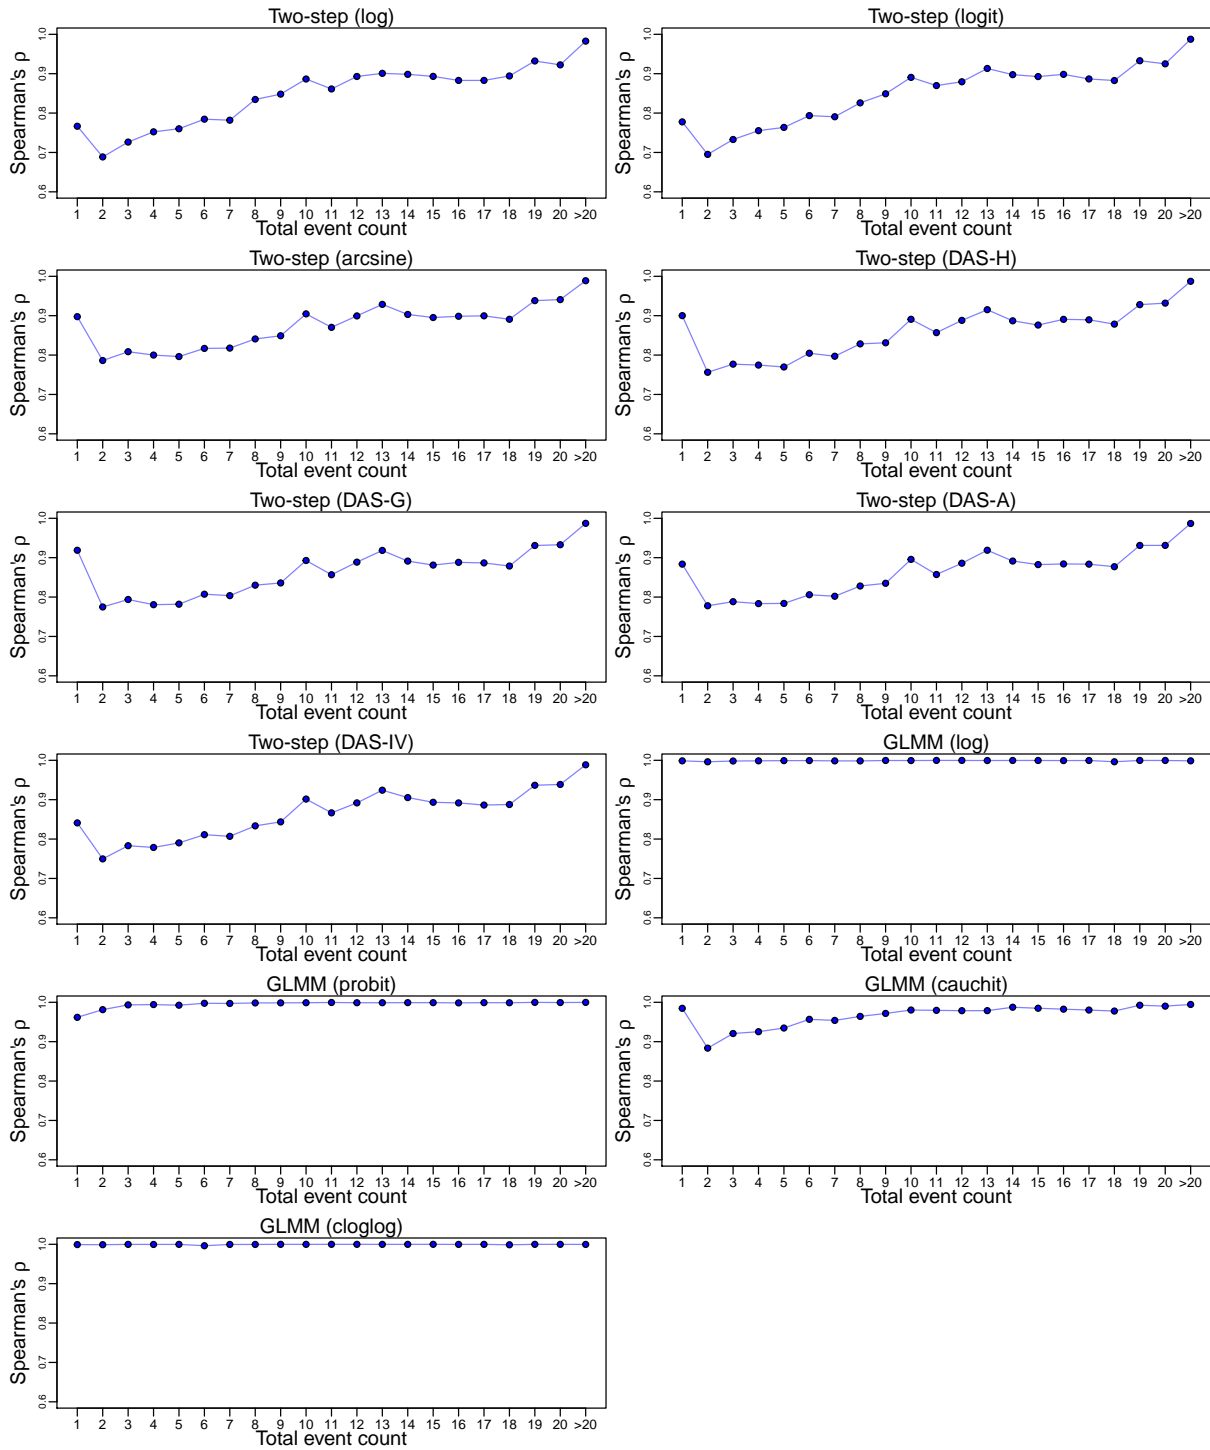

Figure S6: Spearman's rank correlation coefficients  $\rho$  between overall proportion estimates produced by various meta-analysis methods and those by the generalized linear mixed model with the logit link among Cochrane datasets, categorized by the total event count within a meta-analysis.

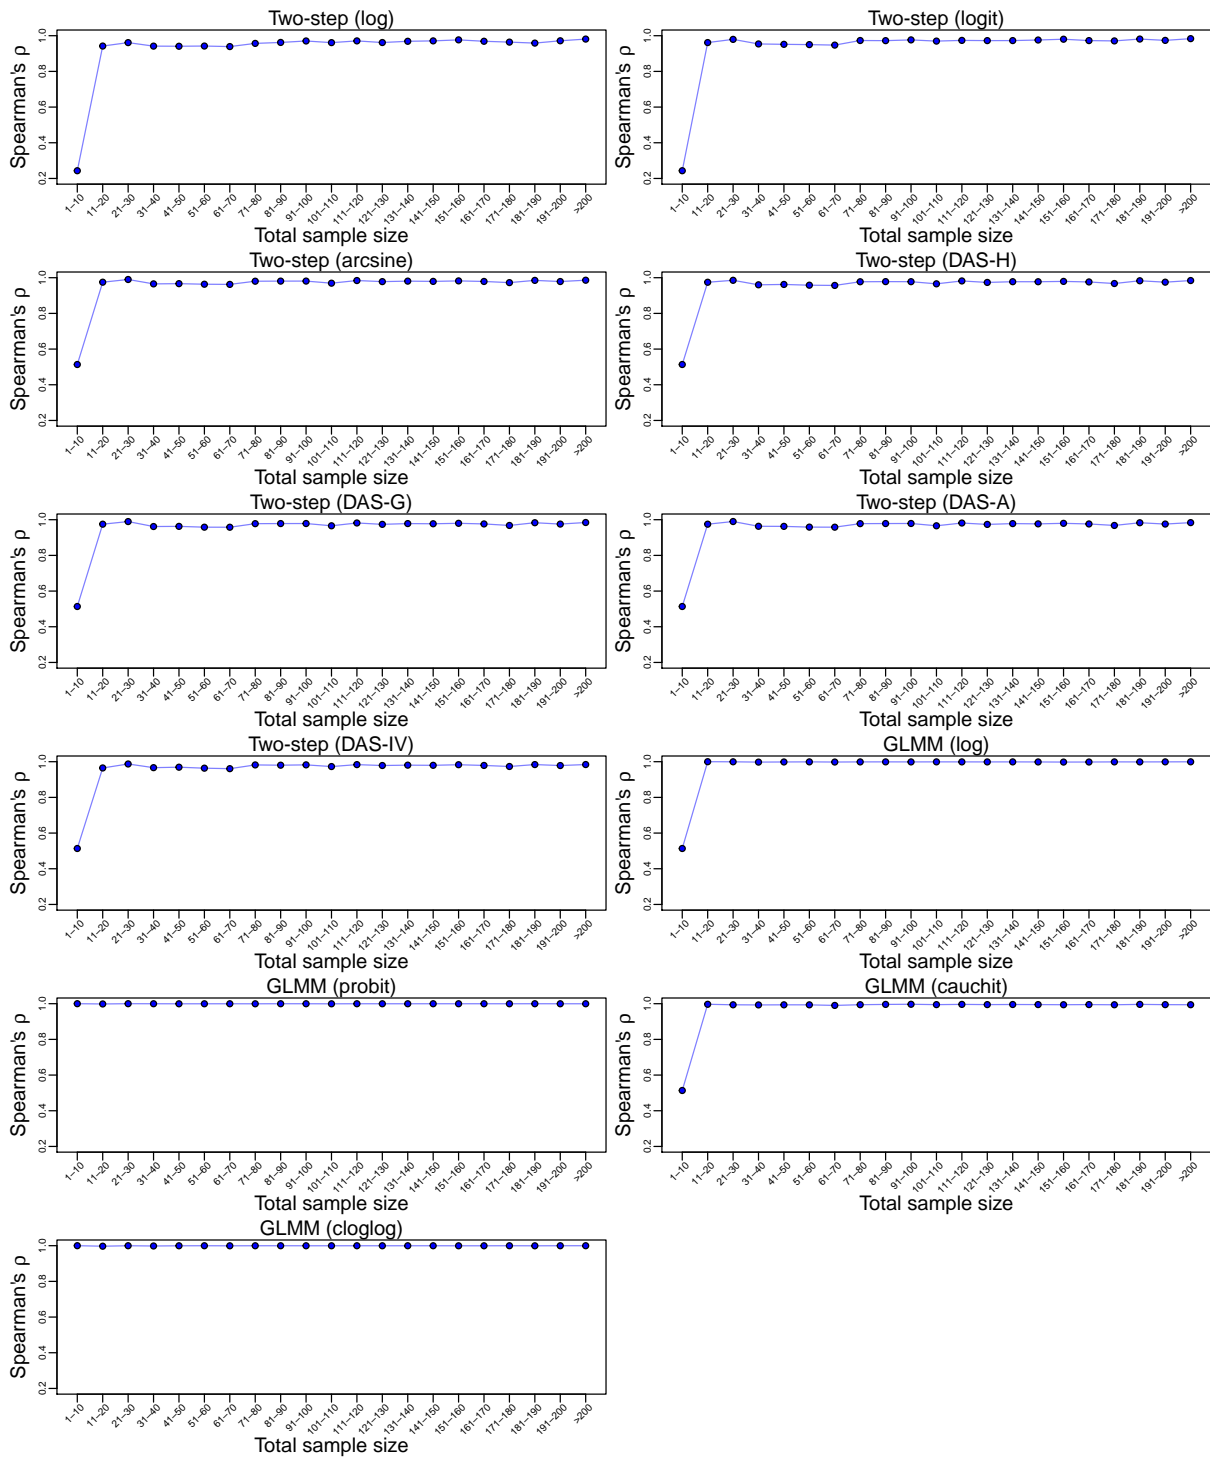

Figure S7: Spearman's rank correlation coefficients  $\rho$  between overall proportion estimates produced by various meta-analysis methods and those by the generalized linear mixed model with the logit link among Cochrane datasets, categorized by the total sample size within a meta-analysis.

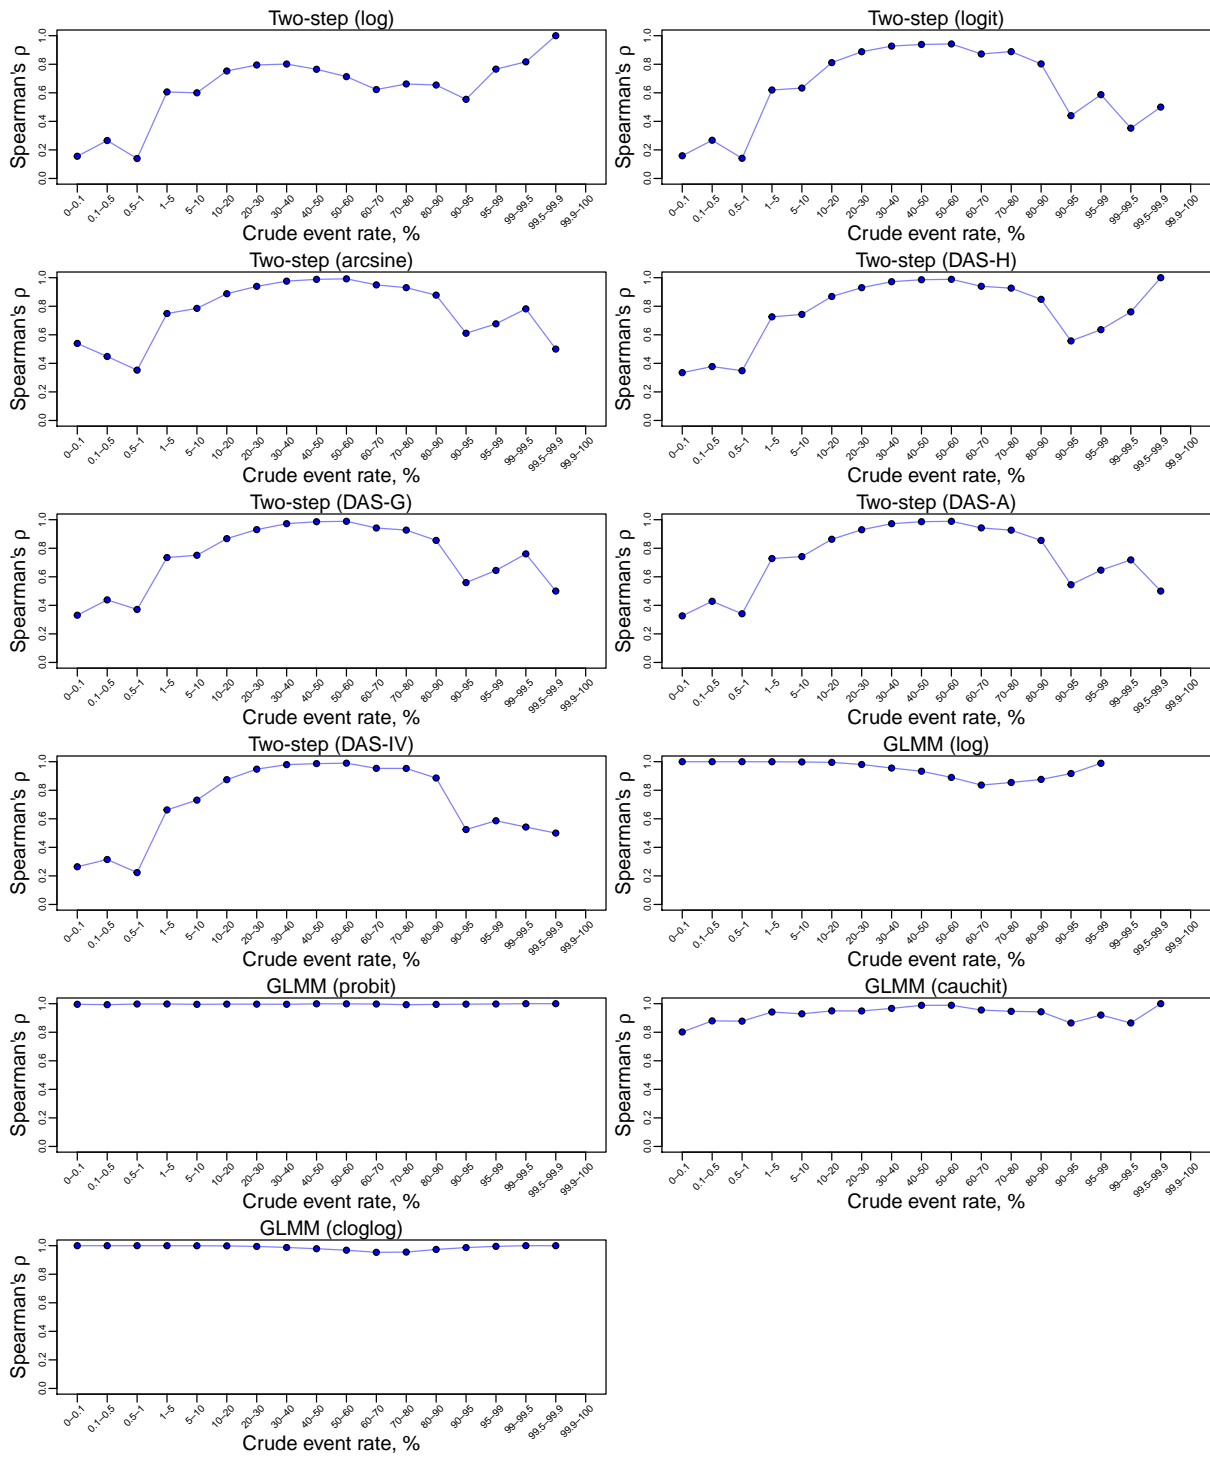

Figure S8: Spearman's rank correlation coefficients  $\rho$  between overall proportion estimates produced by various meta-analysis methods and those by the generalized linear mixed model with the logit link among Cochrane datasets, categorized by the crude event rate of a meta-analysis.



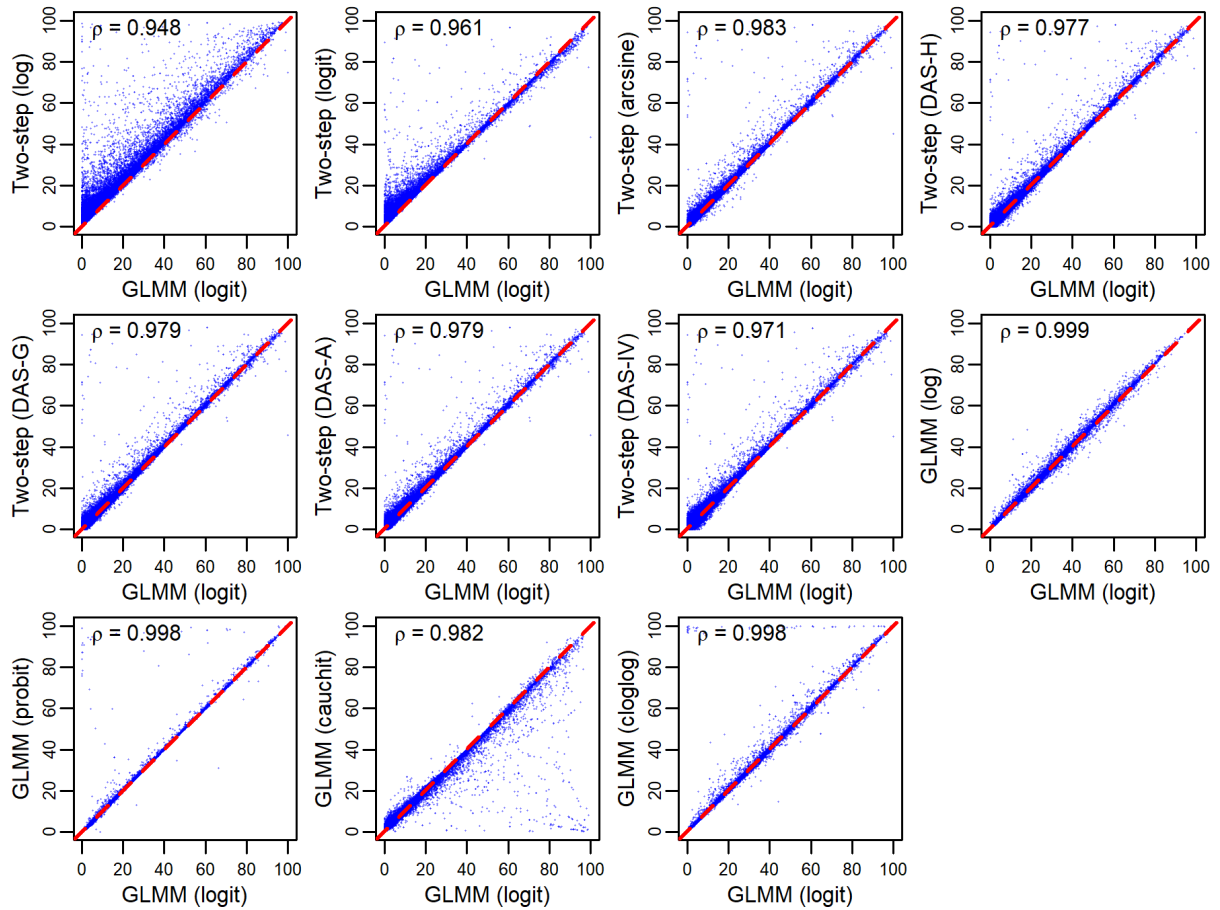

Figure S9: Scatter plots of 95% confidence interval lower bounds of overall proportion estimates (in percentage) produced by various meta-analysis methods against those by the generalized linear mixed model with the logit link among Cochrane datasets. In each panel, the diagonal dashed line represents the identity line, and Spearman's rank correlation coefficient  $\rho$  between the corresponding two meta-analysis methods is displayed.

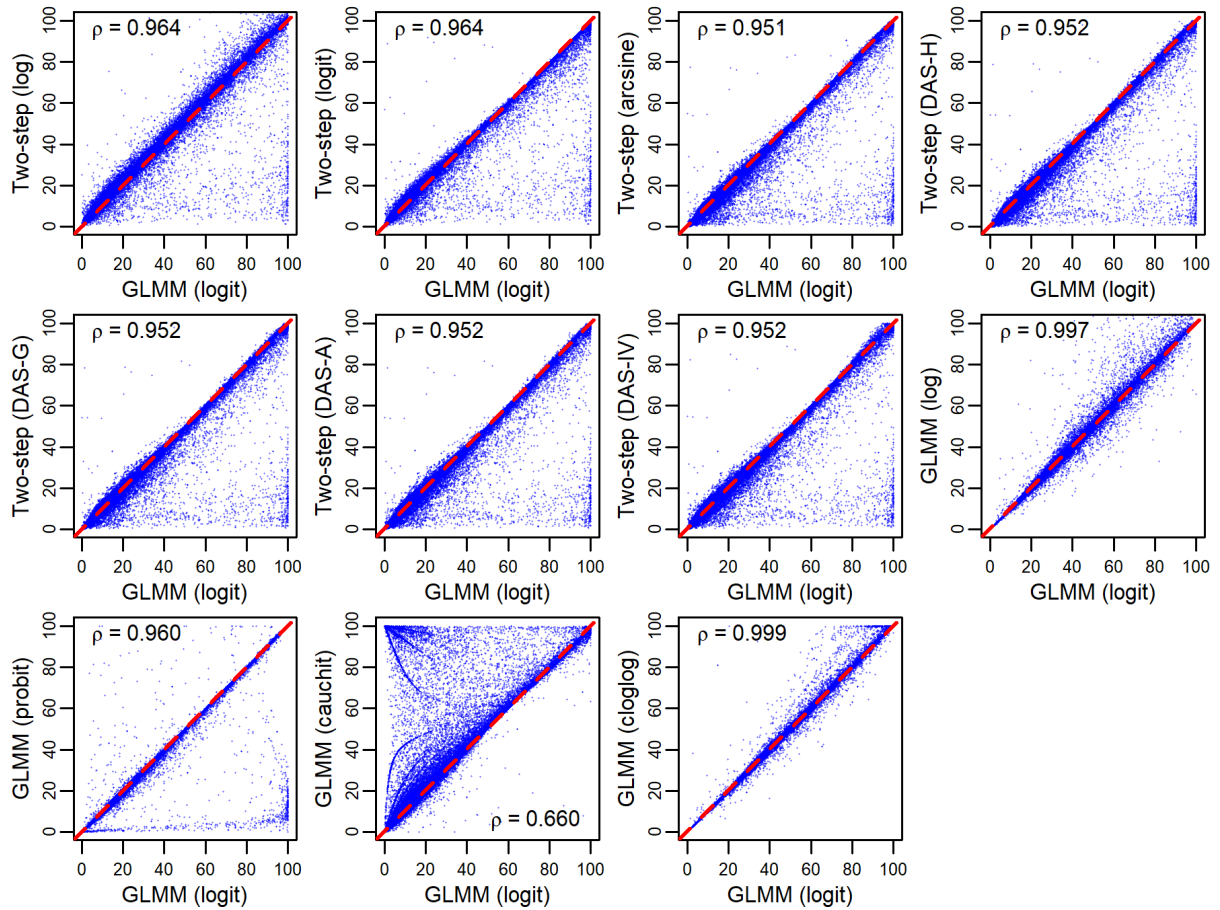

Figure S10: Scatter plots of 95% confidence interval upper bounds of overall proportion estimates (in percentage) produced by various meta-analysis methods against those by the generalized linear mixed model with the logit link among Cochrane datasets. In each panel, the diagonal dashed line represents the identity line, and Spearman's rank correlation coefficient  $\rho$  between the corresponding two meta-analysis methods is displayed. Of note, 95% confidence interval upper bounds produced by the two-step method with the log transformation and those produced by the generalized linear mixed model with the log link may exceed 100%; they were not truncated in our analyses for calculating Spearman's  $\rho$ , and the corresponding two panels only present the incomplete results of upper bounds within 0%–100%.

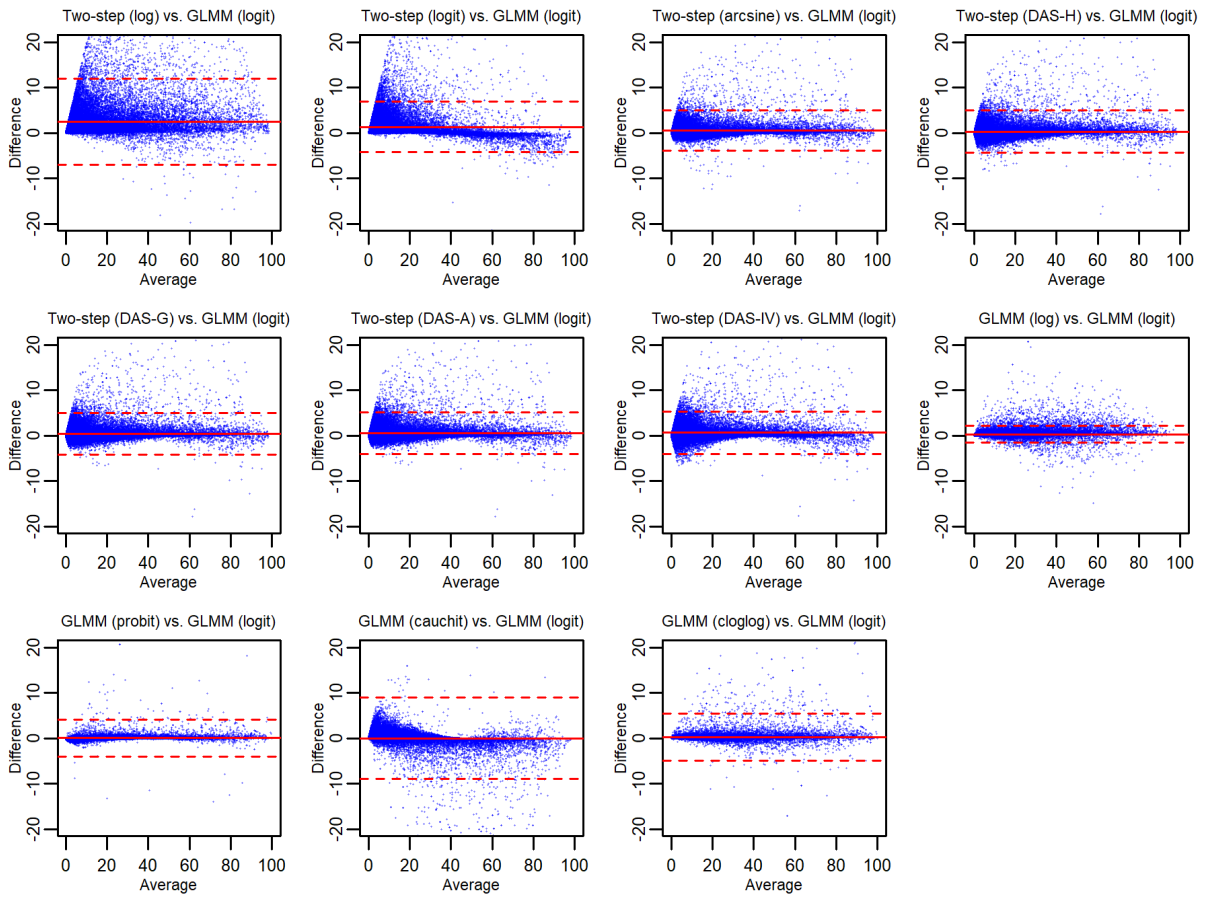

Figure S11: Bland–Altman plots of agreement between 95% confidence interval lower bounds of overall proportion estimates (in percentage) produced by various meta-analysis methods and those by the generalized linear mixed model with the logit link among Cochrane datasets. In each panel, the horizontal solid line represents the mean difference, and the horizontal dashed lines represent 95% limits of agreement.

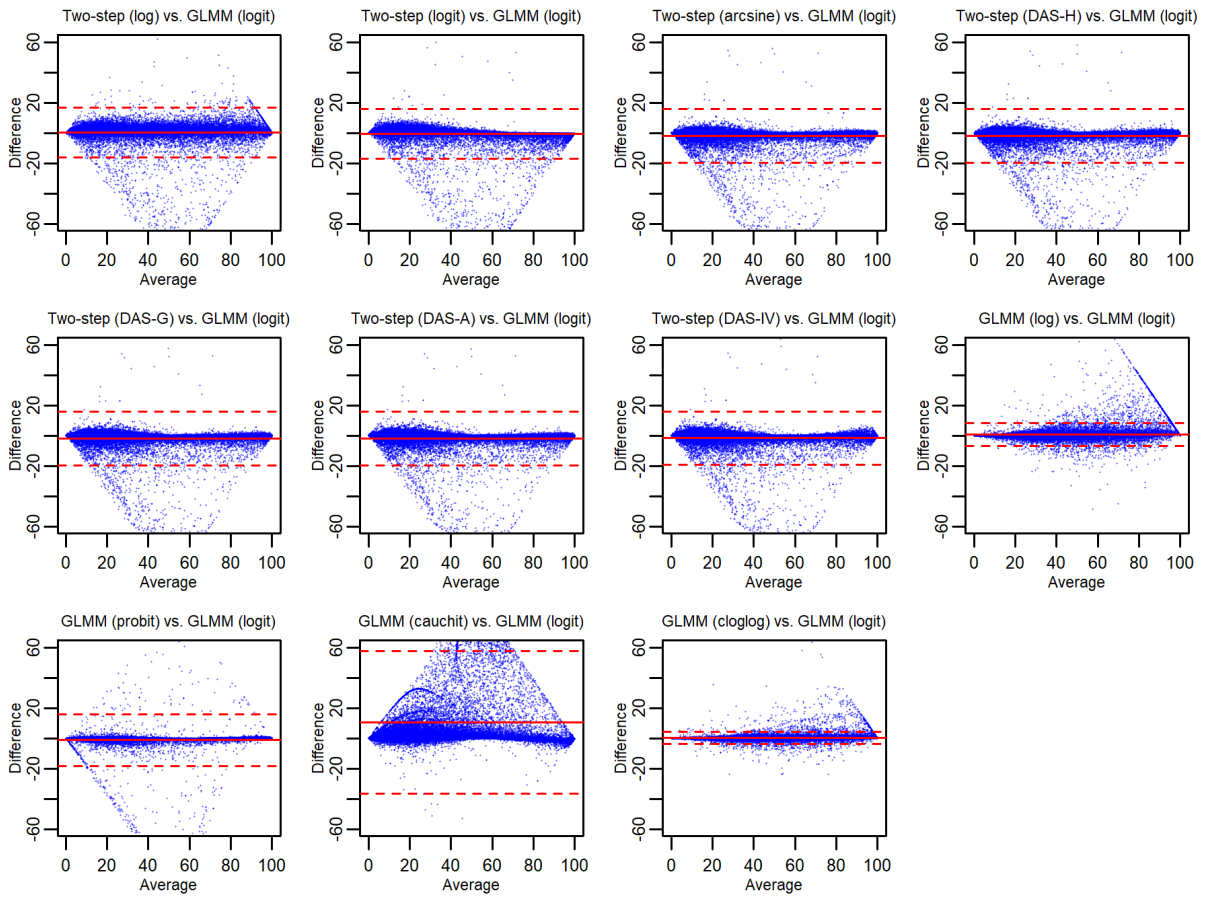

Figure S12: Bland–Altman plots of agreement between 95% confidence interval upper bounds of overall proportion estimates (in percentage) produced by various meta-analysis methods and those by the generalized linear mixed model with the logit link among Cochrane datasets. In each panel, the horizontal solid line represents the mean difference, and the horizontal dashed lines represent 95% limits of agreement.

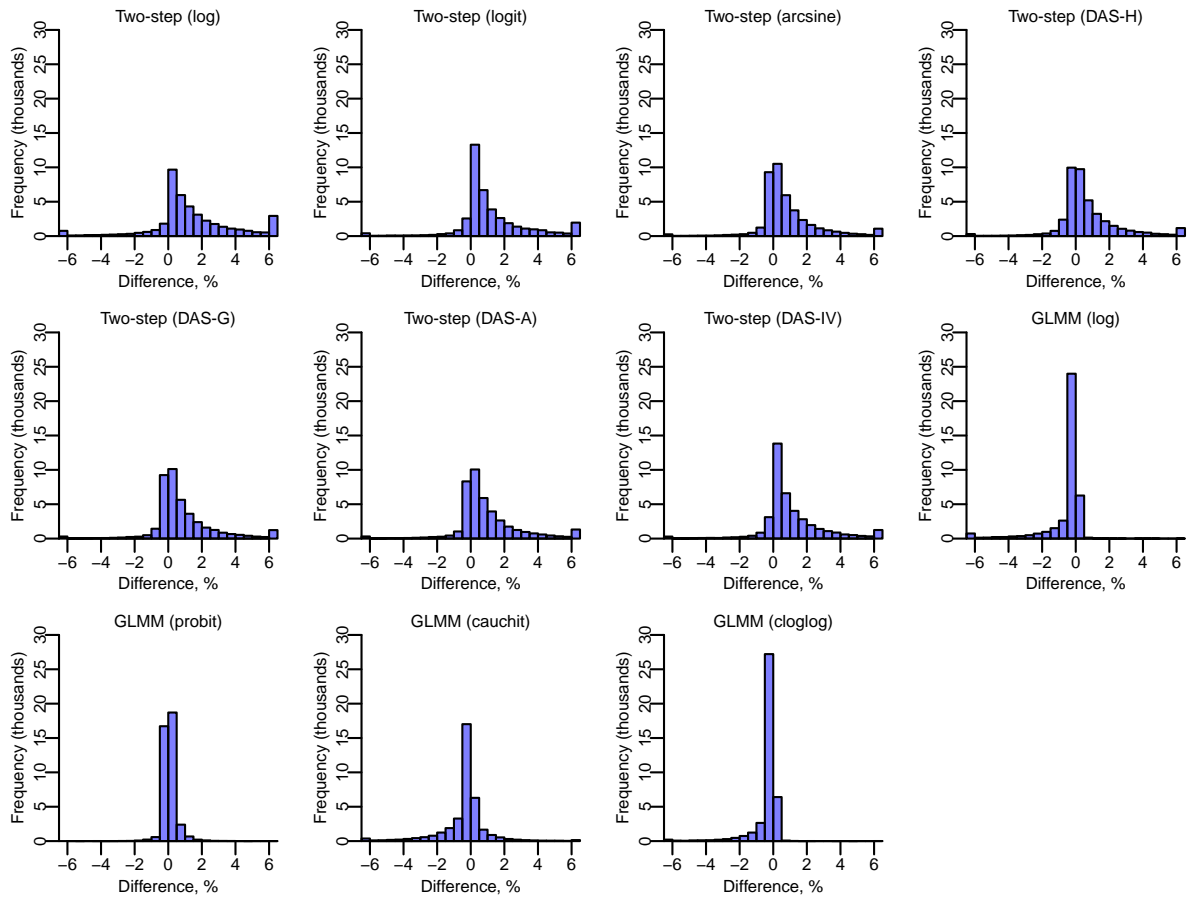

Figure S13: Histograms of absolute differences between overall proportion estimates (in percentage) produced by various meta-analysis methods and those by the generalized linear mixed model with the logit link among Cochrane datasets. In each panel, each bar's width is 0.5%; the bar to the left of  $-6\%$  (if any) represents absolute differences truncated at  $-6\%$ , and the bar to the right of  $6\%$  (if any) represents absolute differences truncated at  $6\%$ .

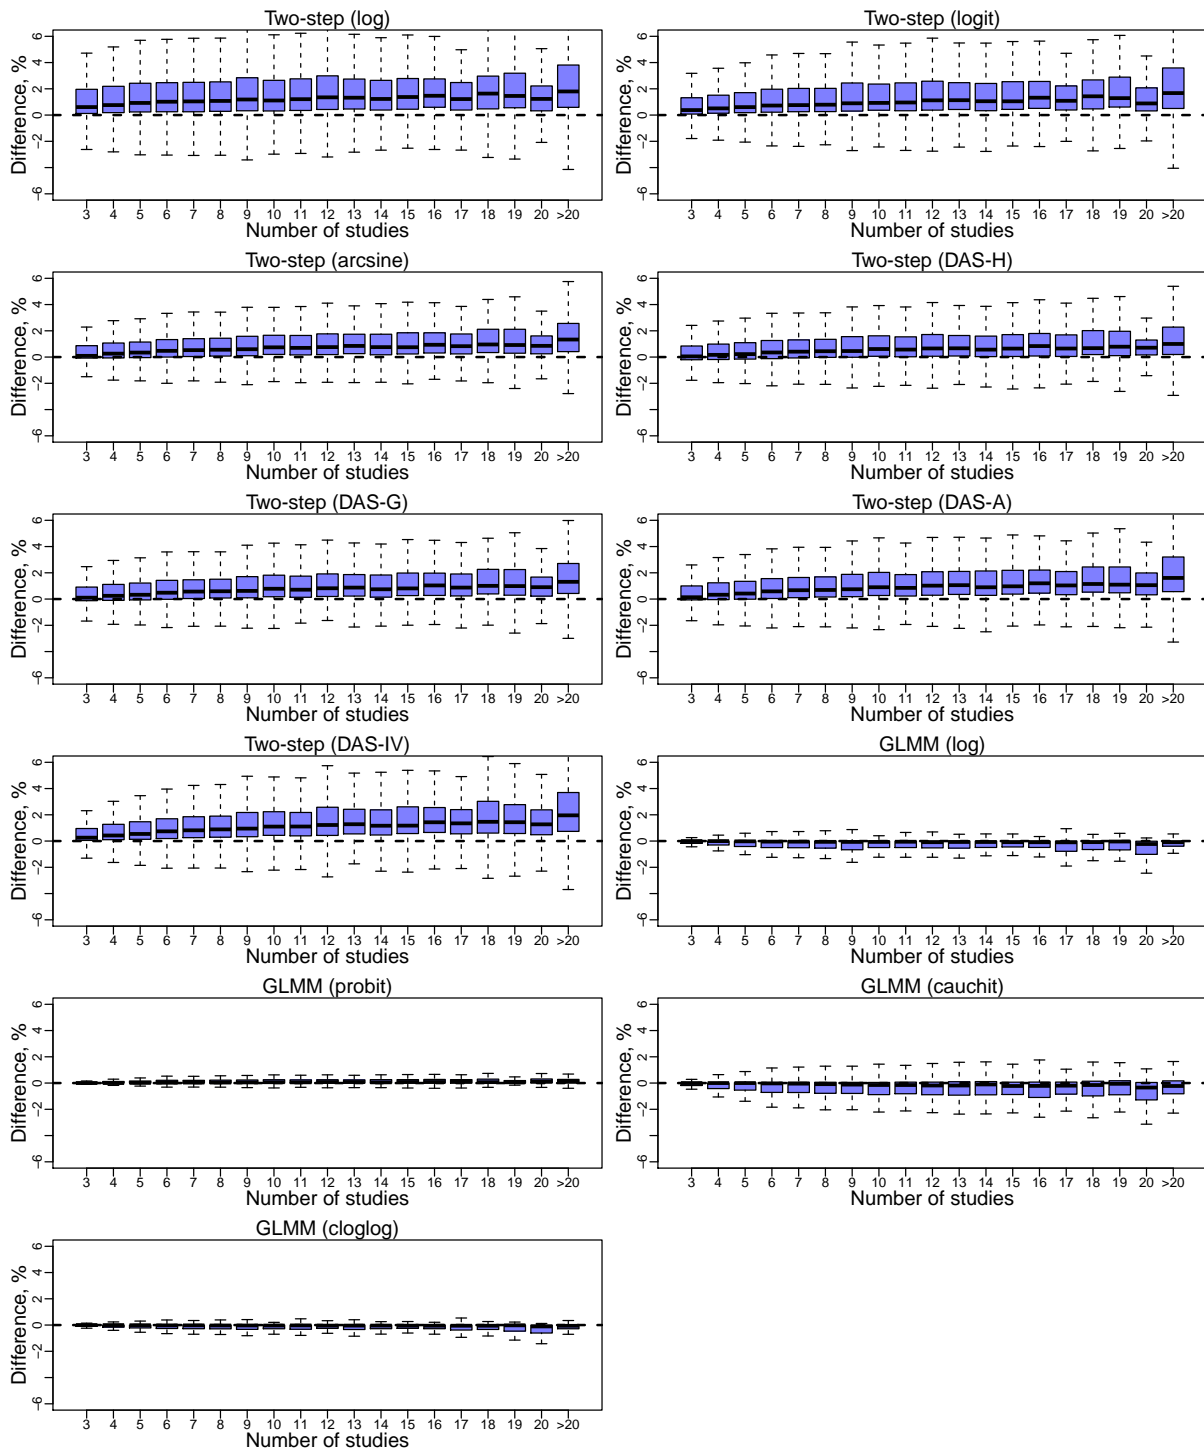

Figure S14: Box plots of absolute differences between overall proportion estimates (in percentage) produced by various meta-analysis methods and those by the generalized linear mixed model with the logit link among Cochrane datasets, categorized by the number of studies within a meta-analysis. In each panel, the horizontal dashed line represents no absolute difference. Because many datasets led to extreme values of absolute differences, the box plots do not present outliers, and the vertical axis only presents the range from  $-6\%$  to  $6\%$ .

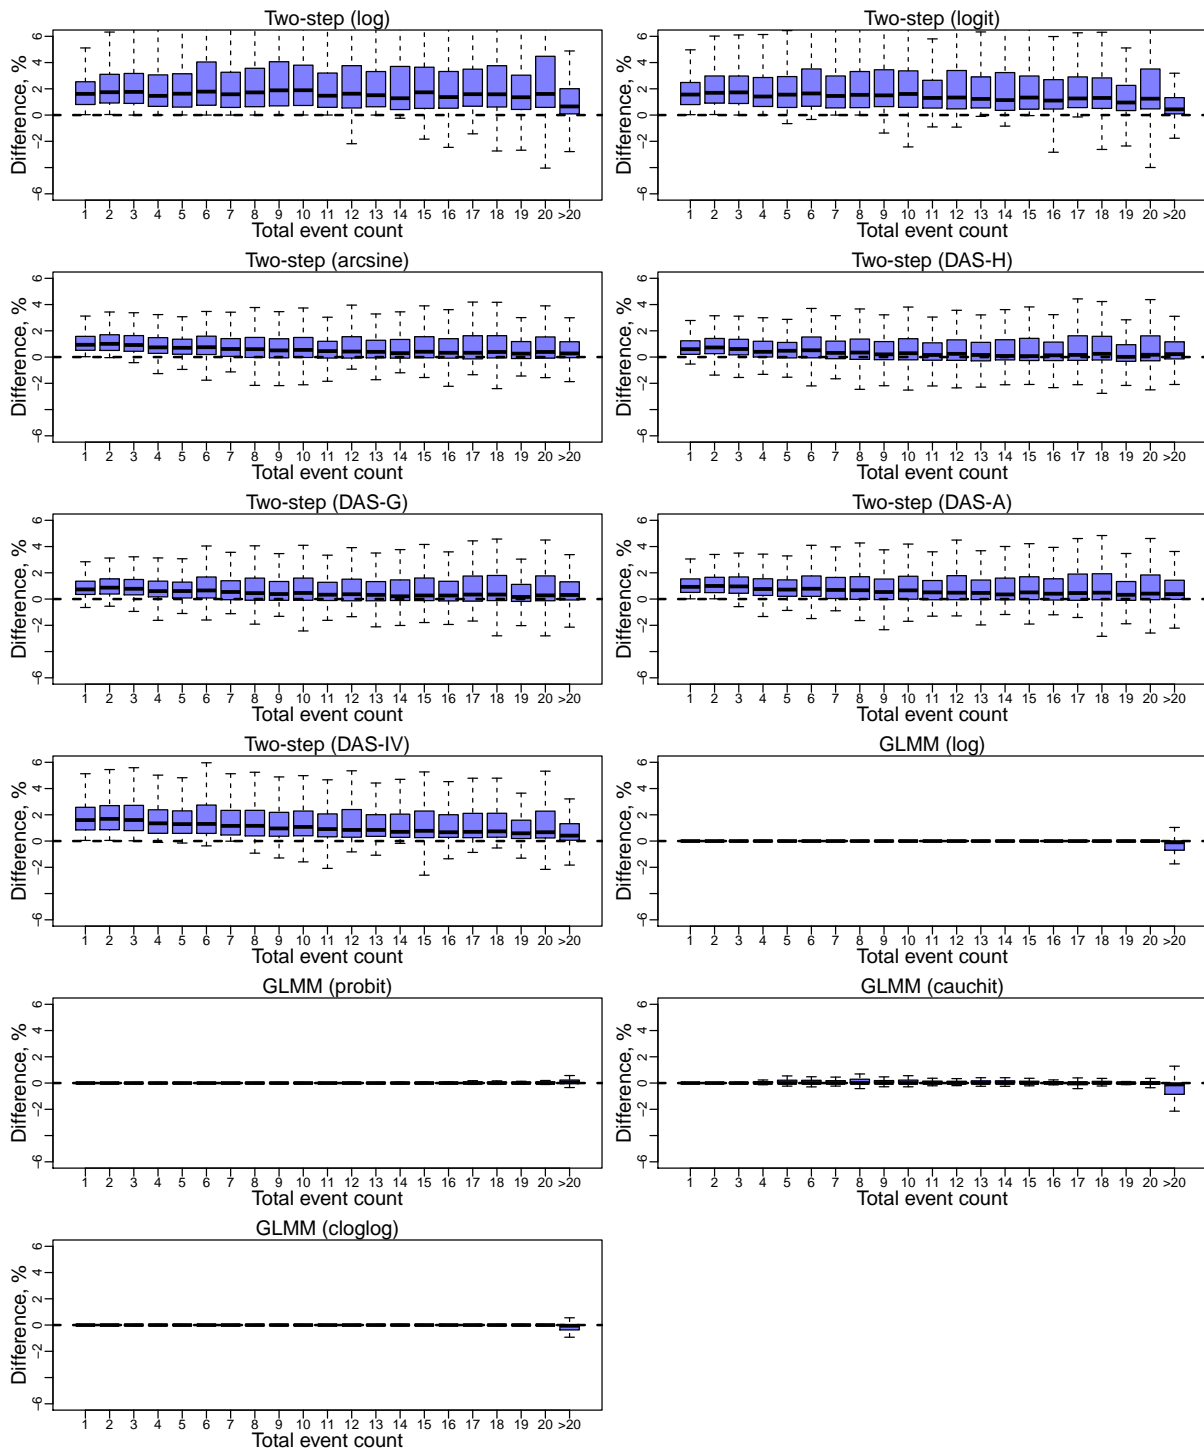

Figure S15: Box plots of absolute differences between overall proportion estimates (in percentage) produced by various meta-analysis methods and those by the generalized linear mixed model with the logit link among Cochrane datasets, categorized by the total event count within a meta-analysis. In each panel, the horizontal dashed line represents no absolute difference. Because many datasets led to extreme values of absolute differences, the box plots do not present outliers, and the vertical axis only presents the range from  $-6\%$  to  $6\%$ .

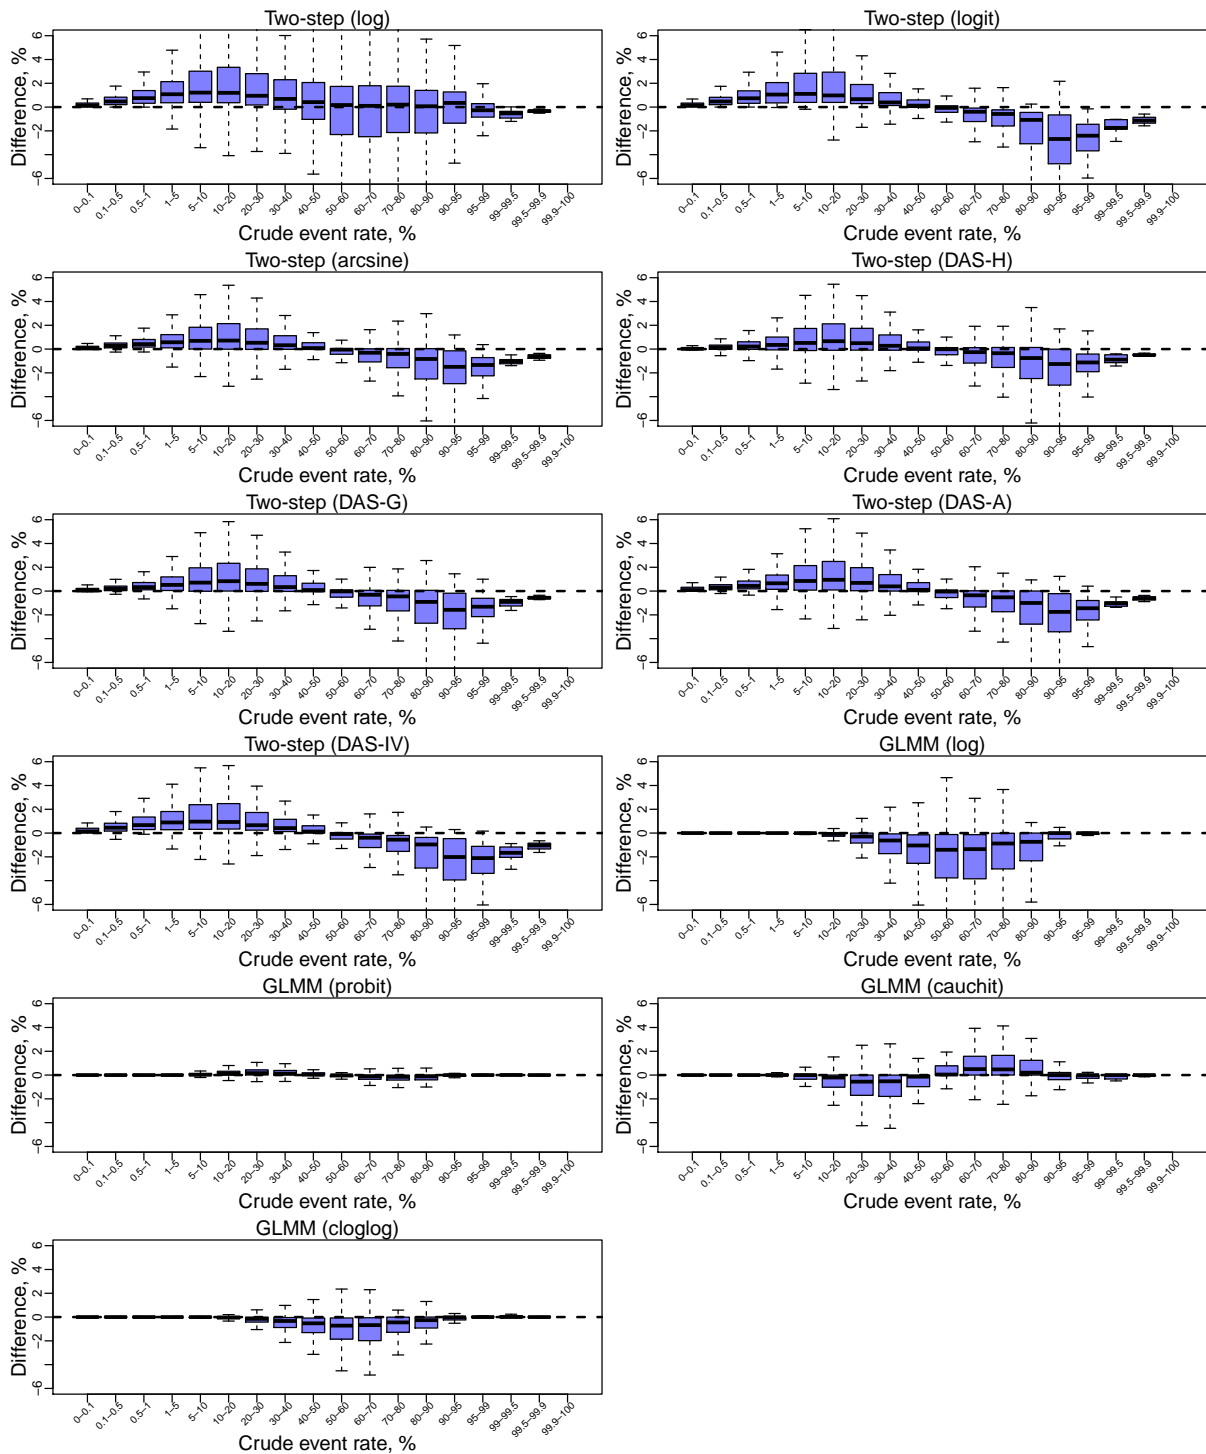

Figure S16: Box plots of absolute differences between overall proportion estimates (in percentage) produced by various meta-analysis methods and those by the generalized linear mixed model with the logit link among Cochrane datasets, categorized by the crude event rate of a meta-analysis. In each panel, the horizontal dashed line represents no absolute difference. Because many datasets led to extreme values of absolute differences, the box plots do not present outliers, and the vertical axis only presents the range from  $-6\%$  to  $6\%$ .



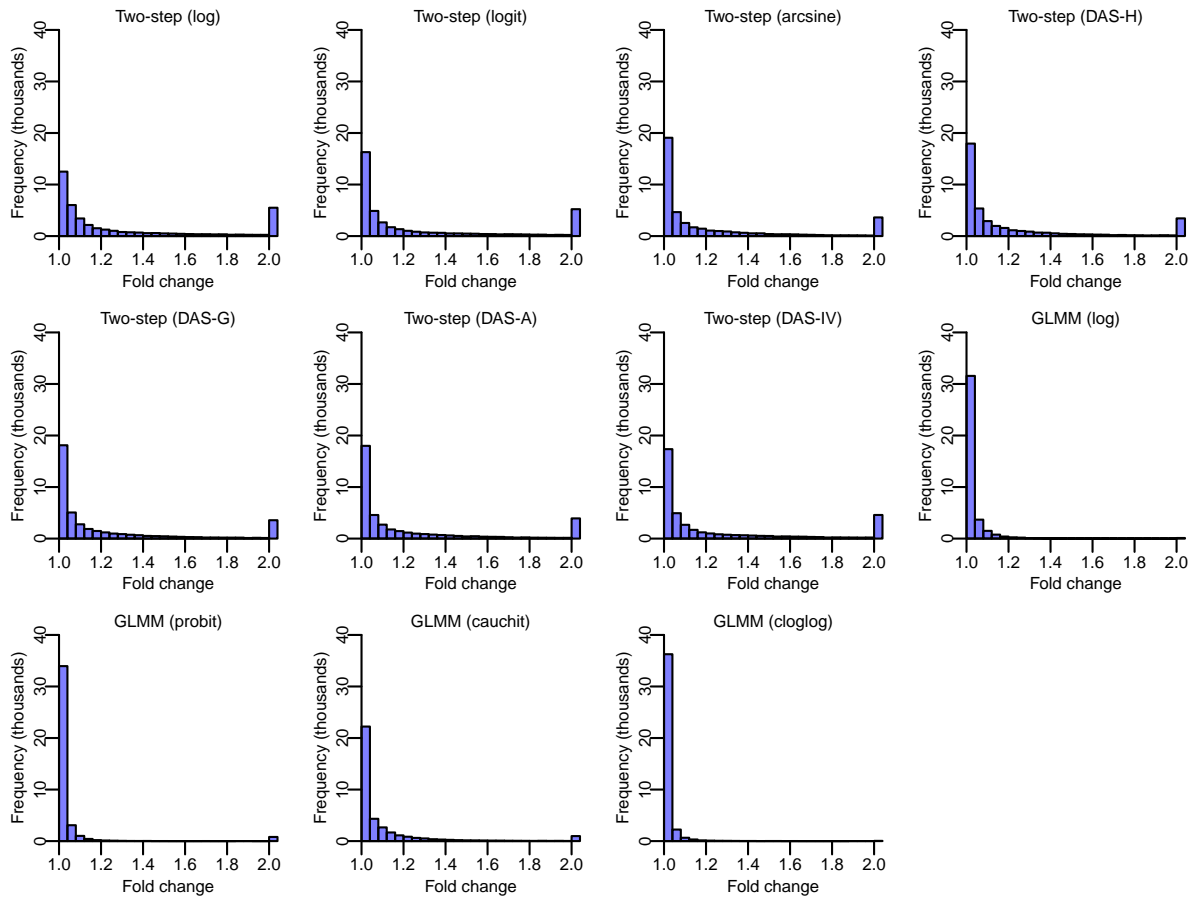

Figure S17: Histograms of fold changes of overall proportion estimates produced by various meta-analysis methods compared with those by the generalized linear mixed model with the logit link among Cochrane datasets. In each panel, each bar's width is 0.04; the bar to the right of 2 (if any) represents fold changes truncated at 2.

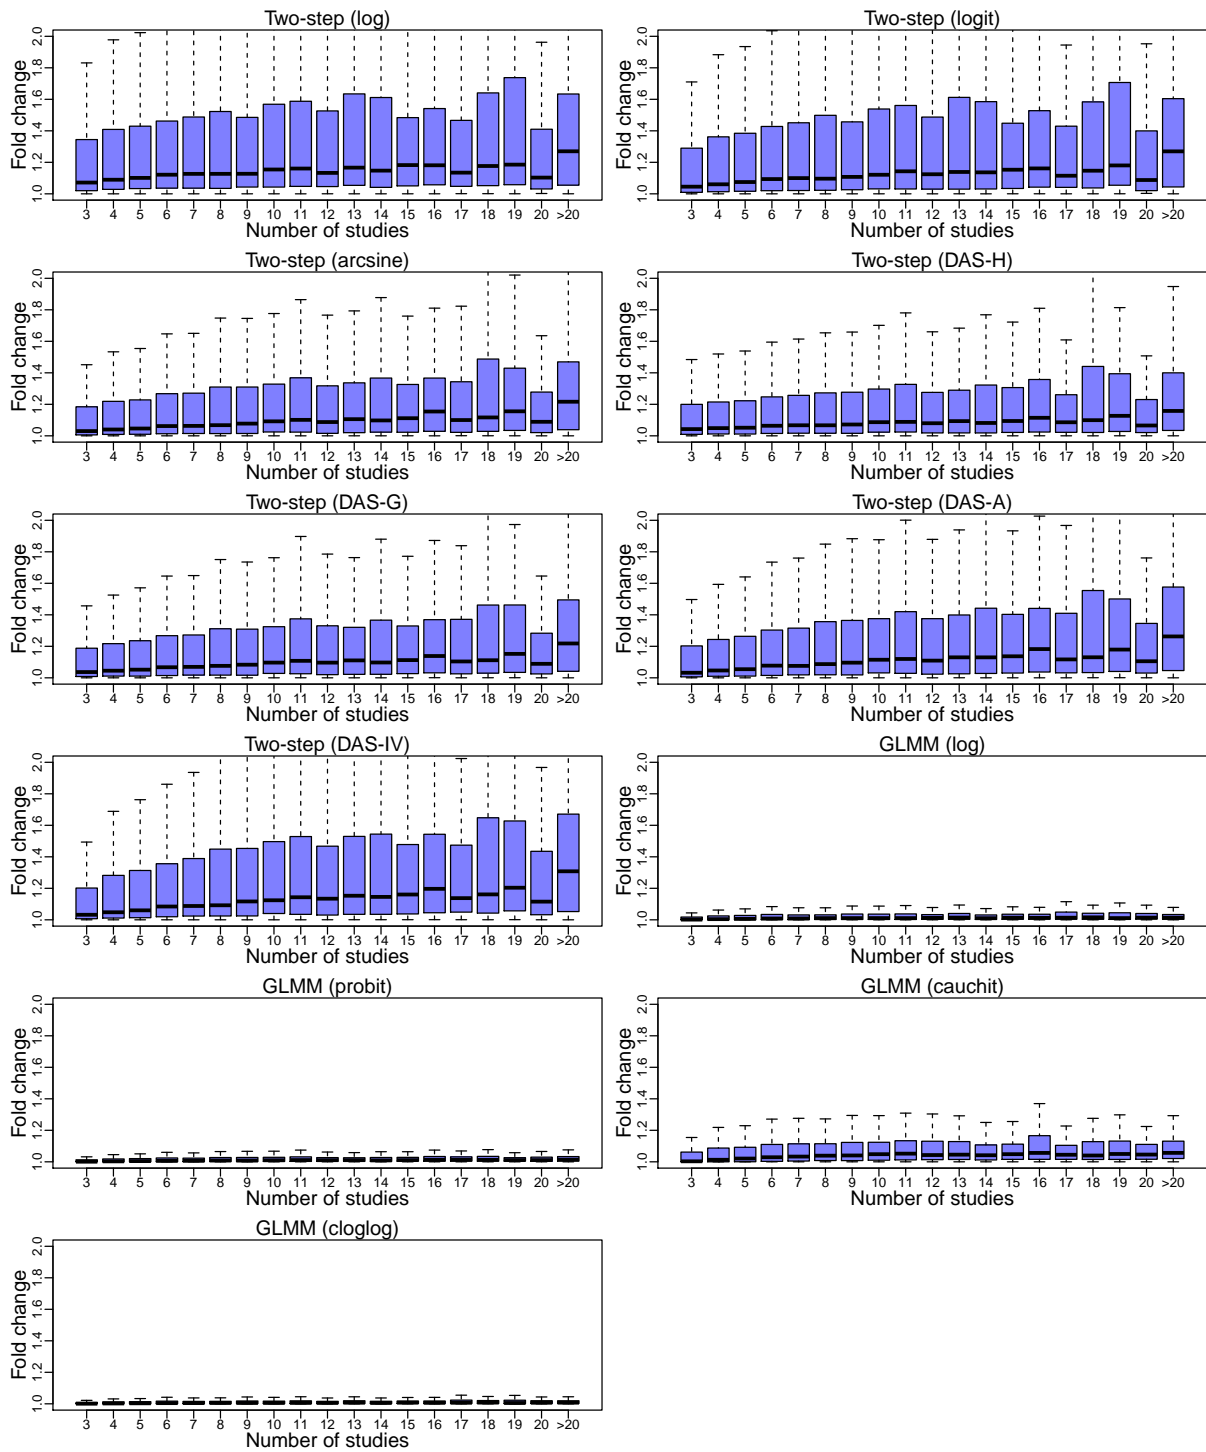

Figure S18: Box plots of fold changes of overall proportion estimates produced by various meta-analysis methods compared with those by the generalized linear mixed model with the logit link among Cochrane datasets, categorized by the number of studies within a meta-analysis. Because many datasets led to extreme values of fold changes, the box plots do not present outliers, and the vertical axis only presents the range from 1 to 2.

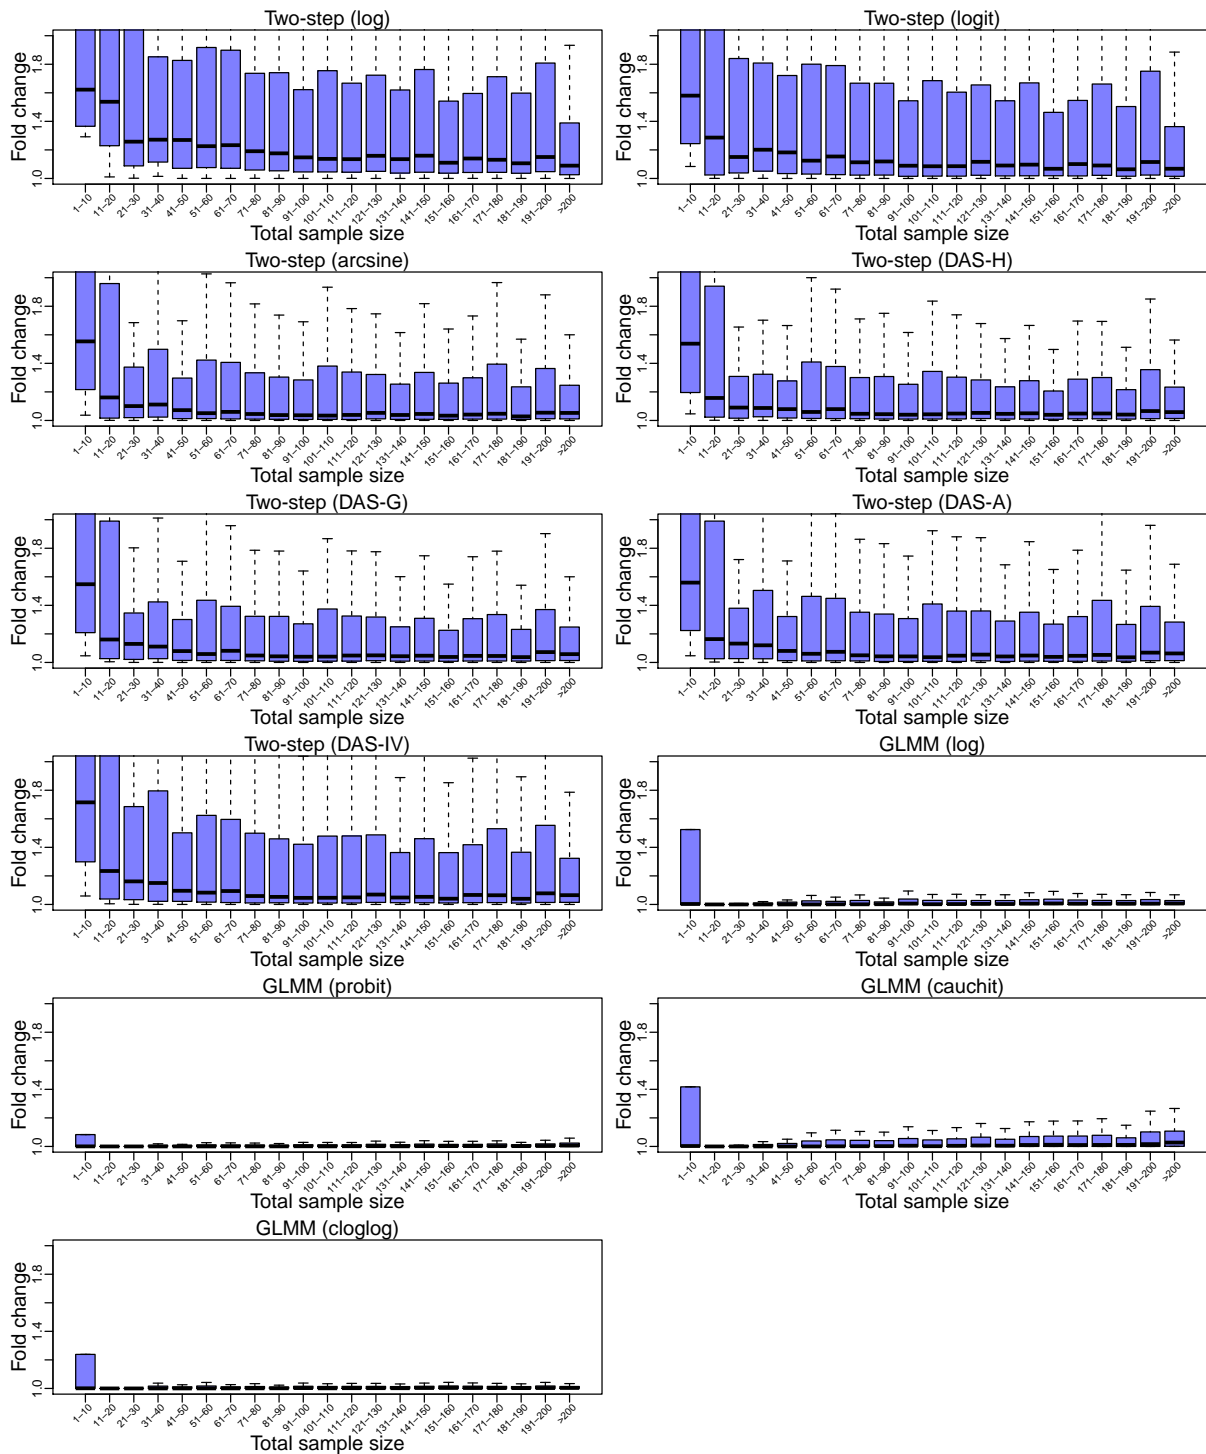

Figure S19: Box plots of fold changes of overall proportion estimates produced by various meta-analysis methods compared with those by the generalized linear mixed model with the logit link among Cochrane datasets, categorized by the total sample size within a meta-analysis. Because many datasets led to extreme values of fold changes, the box plots do not present outliers, and the vertical axis only presents the range from 1 to 2.

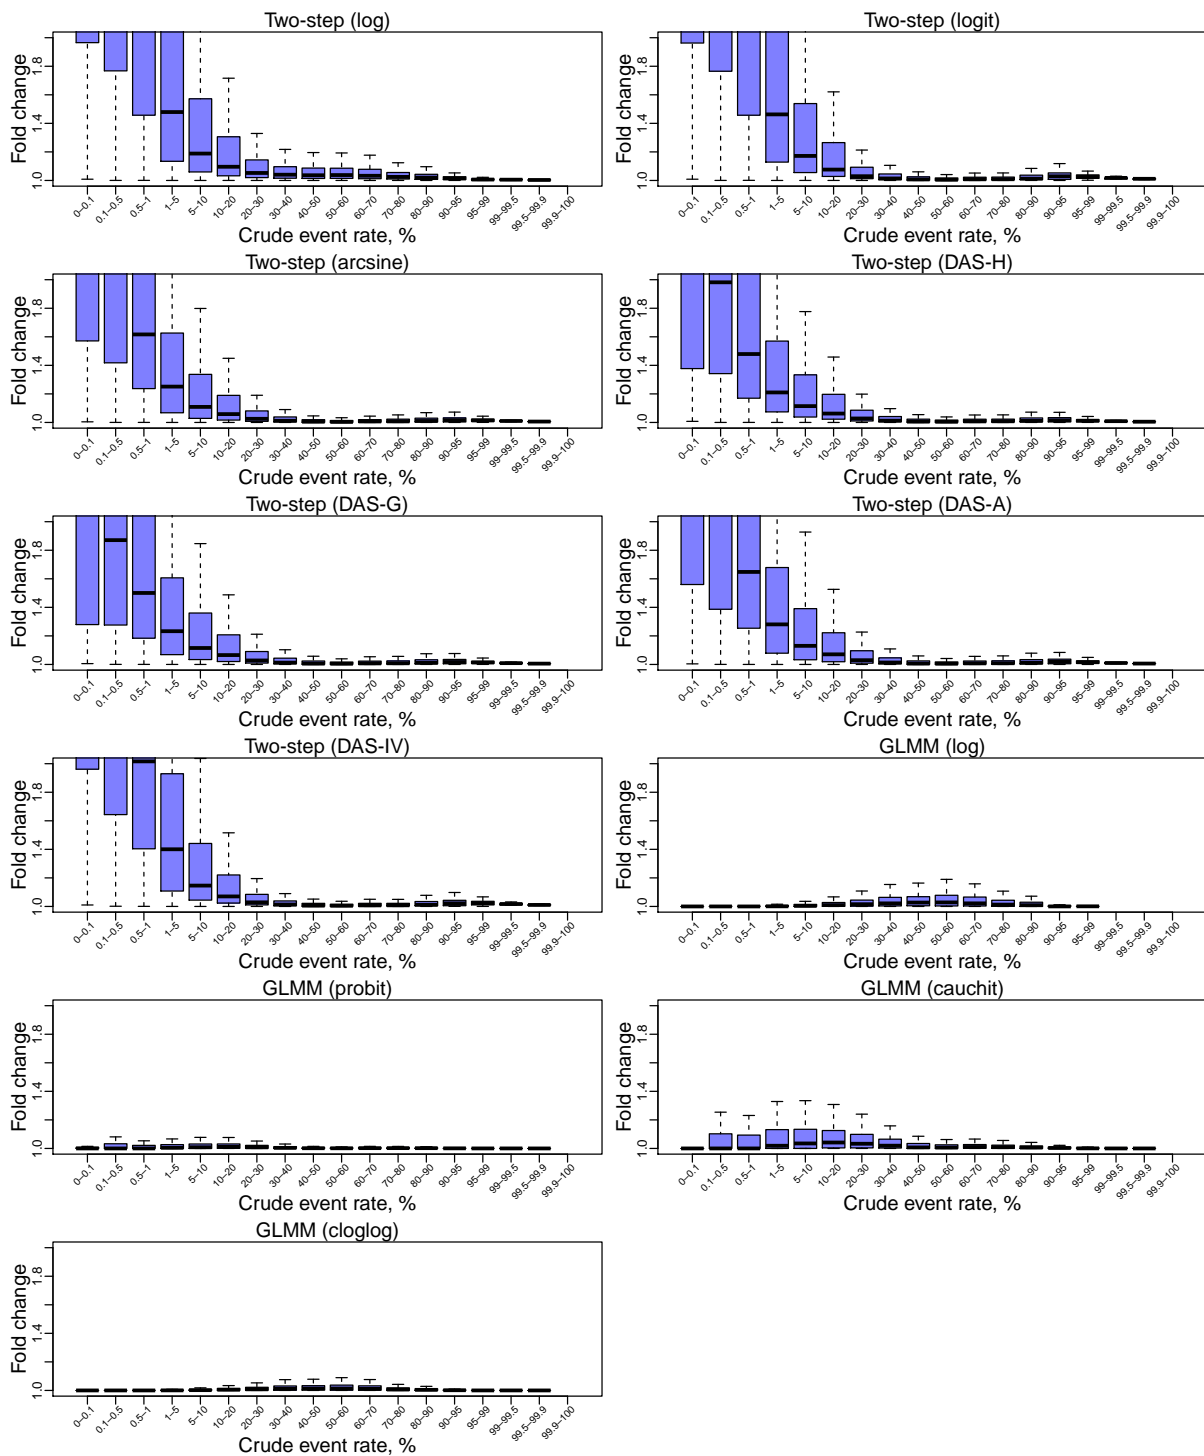

Figure S20: Box plots of fold changes of overall proportion estimates produced by various meta-analysis methods compared with those by the generalized linear mixed model with the logit link among Cochrane datasets, categorized by the crude event rate of a meta-analysis. Because many datasets led to extreme values of fold changes, the box plots do not present outliers, and the vertical axis only presents the range from 1 to 2.

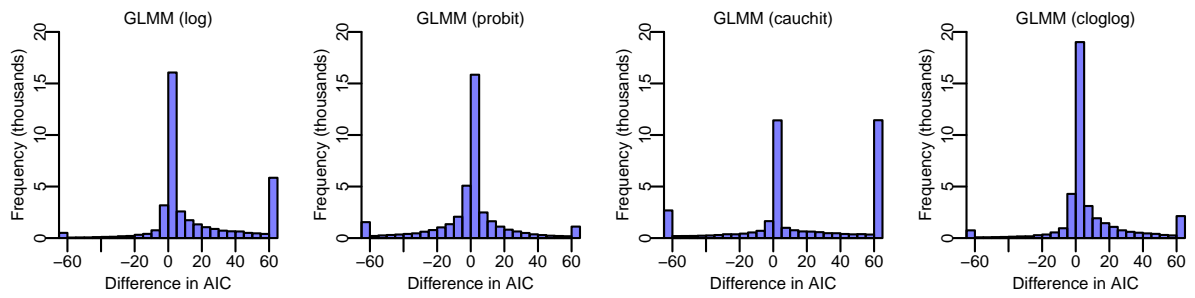

Figure S21: Histograms of differences in AIC values produced by generalized linear mixed models with various link functions compared with those by the generalized linear mixed model with the logit link among Cochrane datasets. In each panel, each bar's width is 5; the bar to the left of  $-60$  (if any) represents differences in AIC truncated at  $-60$ , and the bar to the right of  $60$  (if any) represents differences in AIC truncated at  $60$ .
